# Supplementary material for: Use of Canonical Single Nucleotide Polymorphism (CanSNPs) to characterize Bacillus anthracis outbreak strains in Zambia between 1990 and 2014
Source: PeerJ. 2018 Jul 26;6:e5270. doi: 10.7717/peerj.5270 (PMC6064633; doi:10.7717/peerj.5270)
Supplement: Table S1 [file peerj-06-5270-s001.xlsx]

## Sheet: fig1
id	Continent	origin	publication	MVA8_Keim	CanSNPs13	St	vrra	vrrb1	vrrb2	vrrc1	vrrc2	cg3	Bavntr12	Bavntr16	Bavntr19	Bavntr23	Bavntr35
2007vanErt_202	Africa	Pakistan	Van_Ert2007	temp92	A.Br.008/009	1	10	12	7	49	21	2	6	20	5	4	4
2007vanErt_066	Asia	Australia	Van_Ert2007	GT55	A.Br.Aust94	2	10	12	7	57	17	2	6	20	4	3	4
2007vanErt_067	Africa	Namibia	Van_Ert2007	GT54	A.Br.Aust94	2	10	12	7	57	17	2	6	20	4	3	4
2012Beyer_068	Africa	Okamaja,_Namibia	Beyer2012	B_anthracis_20120_4	A.Br.Aust94	2	10	12	7	57	17	2	6	20	4	3	4
2012Beyer_071	Africa	Otjiwarongo,_Namibia	Beyer2012	B_anthracis_20120_4	A.Br.Aust94	2	10	12	7	57	17	2	6	20	4	3	4
2012Beyer_156	Africa	Okahandja,_Namibia	Beyer2012	GT54	A.Br.Aust94	2	10	12	7	57	17	2	6	20	4	3	4
2007vanErt_073	Africa	Namibia	Van_Ert2007	GT56	A.Br.Aust94	3	10	12	7	57	17	2	6	20	4	4	4
2012Beyer_047	Africa	Namibia	Beyer2012	GT56	A.Br.Aust94	3	10	12	7	57	17	2	6	20	4	4	4
2012Beyer_048	Africa	Gobaub,_Namibia	Beyer2012	GT56	A.Br.Aust94	3	10	12	7	57	17	2	6	20	4	4	4
2012Beyer_049	Africa	Halali,_Namibia	Beyer2012	GT56	A.Br.Aust94	3	10	12	7	57	17	2	6	20	4	4	4
2012Beyer_050	Africa	Gemsbokvlakte,_Namibia	Beyer2012	GT56	A.Br.Aust94	3	10	12	7	57	17	2	6	20	4	4	4
2012Beyer_058	Africa	Namibia	Beyer2012	GT56	A.Br.Aust94	3	10	12	7	57	17	2	6	20	4	4	4
2012Beyer_096	Africa	Okeekolongo,_Namibia	Beyer2012	B_anthracis_20120_5	A.Br.Aust94	3	10	12	7	57	17	2	6	20	4	4	4
2012Beyer_141	Africa	Uutsathima,_Namibia	Beyer2012	B_anthracis_20120_5	A.Br.Aust94	3	10	12	7	57	17	2	6	20	4	4	4
2007vanErt_166	Europe	France	Van_Ert2007	GT20a	A.Br.008/009	4	10	12	7	57	21	1	6	20	5	4	4
2007vanErt_194	Africa	Ethiopia	Van_Ert2007	temp28	A.Br.008/009	5	10	12	7	57	21	2	6	20	4	4	4
2007vanErt_203	Middle_East	Iran	Van_Ert2007	temp93	A.Br.008/009	6	10	12	7	57	21	2	6	21	5	4	4
2007vanErt_083	Africa	South_Africa	Van_Ert2007	temp70	A.Br.Aust94	7	10	16	5	57	17	2	6	20	4	5	4
CDC_684	America	USA	unk	temp2	A.Br.Vollum	8	10	16	6	48	21	2	6	19	5	4	4
2007vanErt_115	America	USA	Van_Ert2007	temp75	A.Br.Vollum	9	10	16	6	48	21	2	6	20	5	4	4
2007vanErt_024	America	USA	Van_Ert2007	temp1	A.Br.Ames	10	10	16	6	53	17	2	6	20	4	4	5
2007vanErt_025	America	USA	Van_Ert2007	temp55	A.Br.Ames	10	10	16	6	53	17	2	6	20	4	4	5
2007vanErt_026	America	USA	Van_Ert2007	temp1	A.Br.Ames	10	10	16	6	53	17	2	6	20	4	4	5
A0248	America	Ohio,_USA	unk	temp1	A.Br.Ames	10	10	16	6	53	17	2	6	20	4	4	5
A2012	America	West_Palm_Beach,_Florida	Read2002	temp1	unk	10	10	16	6	53	17	2	6	20	4	4	5
Ames_Ancestor	America	Texas,_USA	unk	temp1	A.Br.Ames	10	10	16	6	53	17	2	6	20	4	4	5
2007vanErt_055	Asia	China	Van_Ert2007	temp64	A.Br.001/002	11	10	16	6	53	17	2	6	20	4	4	6
2009Simonson_065	Asia	Qingdao,_China	Simonson2009	temp64	A.Br.001/002	11	10	16	6	53	17	2	6	20	4	4	6
2009Simonson_072	Asia	Qingdao,_China	Simonson2009	temp64	A.Br.001/002	11	10	16	6	53	17	2	6	20	4	4	6
2007vanErt_162	Middle_East	Turkey	Van_Ert2007	GT12	A.Br.008/009	12	10	16	6	57	21	1	6	20	5	4	4
2007vanErt_163	Europe	Italy	Van_Ert2007	temp8	A.Br.008/009	12	10	16	6	57	21	1	6	20	5	4	4
2007vanErt_204	Middle_East	Turkey	Van_Ert2007	GT28	A.Br.008/009	13	10	16	6	57	21	2	6	20	5	4	4
2007vanErt_034	Asia	China	Van_Ert2007	temp58	A.Br.001/002	14	10	16	7	32	17	2	6	20	4	4	5
2007vanErt_060	Asia	China	Van_Ert2007	temp65	A.Br.Aust94	15	10	16	7	33	13	2	6	20	4	5	4
2007vanErt_061	Asia	China	Van_Ert2007	temp66	A.Br.Aust94	15	10	16	7	33	13	2	6	20	4	5	4
2009Simonson_021	Asia	Xinjiang,_China	Simonson2009	temp65	A.Br.Aust94	15	10	16	7	33	13	2	6	20	4	5	4
2009Simonson_025	Asia	Xinjiang,_China	Simonson2009	temp65	A.Br.Aust94	15	10	16	7	33	13	2	6	20	4	5	4
2009Simonson_036	Asia	Xinjiang,_China	Simonson2009	temp65	A.Br.Aust94	15	10	16	7	33	13	2	6	20	4	5	4
2009Simonson_042	Asia	Xinjiang,_China	Simonson2009	temp65	A.Br.Aust94	15	10	16	7	33	13	2	6	20	4	5	4
2009Simonson_044	Asia	Xinjiang,_China	Simonson2009	temp65	A.Br.Aust94	15	10	16	7	33	13	2	6	20	4	5	4
2009Simonson_047	Asia	Xinjiang,_China	Simonson2009	temp65	A.Br.Aust94	15	10	16	7	33	13	2	6	20	4	5	4
2009Simonson_049	Asia	Xinjiang,_China	Simonson2009	temp65	A.Br.Aust94	15	10	16	7	33	13	2	6	20	4	5	4
2009Simonson_050	Asia	Xinjiang,_China	Simonson2009	temp65	A.Br.Aust94	15	10	16	7	33	13	2	6	20	4	5	4
2009Simonson_055	Asia	Xinjiang,_China	Simonson2009	temp65	A.Br.Aust94	15	10	16	7	33	13	2	6	20	4	5	4
2009Simonson_056	Asia	Xinjiang,_China	Simonson2009	temp66	A.Br.Aust94	15	10	16	7	33	13	2	6	20	4	5	4
2009Simonson_057	Asia	Xinjiang,_China	Simonson2009	temp65	A.Br.Aust94	15	10	16	7	33	13	2	6	20	4	5	4
2009Simonson_058	Asia	Xinjiang,_China	Simonson2009	temp65	A.Br.Aust94	15	10	16	7	33	13	2	6	20	4	5	4
2009Simonson_059	Asia	Xinjiang,_China	Simonson2009	temp65	A.Br.Aust94	15	10	16	7	33	13	2	6	20	4	5	4
2007vanErt_057	Asia	Australia	Van_Ert2007	GT66	A.Br.Aust94	16	10	16	7	33	17	2	6	20	4	3	4
2007vanErt_058	Asia	China	Van_Ert2007	GT66	A.Br.Aust94	17	10	16	7	33	17	2	6	20	4	5	4
2009Simonson_017	Asia	Xinjiang,_China	Simonson2009	GT66	A.Br.Aust94	17	10	16	7	33	17	2	6	20	4	5	4
2009Simonson_018	Asia	Xinjiang,_China	Simonson2009	GT66	A.Br.Aust94	17	10	16	7	33	17	2	6	20	4	5	4
2009Simonson_019	Asia	Xinjiang,_China	Simonson2009	GT66	A.Br.Aust94	17	10	16	7	33	17	2	6	20	4	5	4
2009Simonson_020	Asia	Xinjiang,_China	Simonson2009	GT66	A.Br.Aust94	17	10	16	7	33	17	2	6	20	4	5	4
2009Simonson_022	Asia	Xinjiang,_China	Simonson2009	GT66	A.Br.Aust94	17	10	16	7	33	17	2	6	20	4	5	4
2009Simonson_023	Asia	Xinjiang,_China	Simonson2009	GT66	A.Br.Aust94	17	10	16	7	33	17	2	6	20	4	5	4
2009Simonson_024	Asia	Xinjiang,_China	Simonson2009	GT66	A.Br.Aust94	17	10	16	7	33	17	2	6	20	4	5	4
2009Simonson_026	Asia	Xinjiang,_China	Simonson2009	GT66	A.Br.Aust94	17	10	16	7	33	17	2	6	20	4	5	4
2009Simonson_027	Asia	Xinjiang,_China	Simonson2009	GT66	A.Br.Aust94	17	10	16	7	33	17	2	6	20	4	5	4
2009Simonson_028	Asia	Xinjiang,_China	Simonson2009	GT66	A.Br.Aust94	17	10	16	7	33	17	2	6	20	4	5	4
2009Simonson_029	Asia	Xinjiang,_China	Simonson2009	GT66	A.Br.Aust94	17	10	16	7	33	17	2	6	20	4	5	4
2009Simonson_030	Asia	Xinjiang,_China	Simonson2009	GT66	A.Br.Aust94	17	10	16	7	33	17	2	6	20	4	5	4
2009Simonson_031	Asia	Xinjiang,_China	Simonson2009	GT66	A.Br.Aust94	17	10	16	7	33	17	2	6	20	4	5	4
2009Simonson_032	Asia	Xinjiang,_China	Simonson2009	GT66	A.Br.Aust94	17	10	16	7	33	17	2	6	20	4	5	4
2009Simonson_033	Asia	Xinjiang,_China	Simonson2009	GT66	A.Br.Aust94	17	10	16	7	33	17	2	6	20	4	5	4
2009Simonson_034	Asia	Xinjiang,_China	Simonson2009	GT66	A.Br.Aust94	17	10	16	7	33	17	2	6	20	4	5	4
2009Simonson_035	Asia	Xinjiang,_China	Simonson2009	GT66	A.Br.Aust94	17	10	16	7	33	17	2	6	20	4	5	4
2009Simonson_037	Asia	Xinjiang,_China	Simonson2009	GT66	A.Br.Aust94	17	10	16	7	33	17	2	6	20	4	5	4
2009Simonson_038	Asia	Xinjiang,_China	Simonson2009	GT66	A.Br.Aust94	17	10	16	7	33	17	2	6	20	4	5	4
2009Simonson_039	Asia	Xinjiang,_China	Simonson2009	GT66	A.Br.Aust94	17	10	16	7	33	17	2	6	20	4	5	4
2009Simonson_040	Asia	Xinjiang,_China	Simonson2009	GT66	A.Br.Aust94	17	10	16	7	33	17	2	6	20	4	5	4
2009Simonson_041	Asia	Xinjiang,_China	Simonson2009	GT66	A.Br.Aust94	17	10	16	7	33	17	2	6	20	4	5	4
2009Simonson_043	Asia	Xinjiang,_China	Simonson2009	GT66	A.Br.Aust94	17	10	16	7	33	17	2	6	20	4	5	4
2009Simonson_045	Asia	Xinjiang,_China	Simonson2009	GT66	A.Br.Aust94	17	10	16	7	33	17	2	6	20	4	5	4
2009Simonson_046	Asia	Xinjiang,_China	Simonson2009	GT66	A.Br.Aust94	17	10	16	7	33	17	2	6	20	4	5	4
2009Simonson_048	Asia	Xinjiang,_China	Simonson2009	GT66	A.Br.Aust94	17	10	16	7	33	17	2	6	20	4	5	4
2009Simonson_051	Asia	Xinjiang,_China	Simonson2009	GT66	A.Br.Aust94	17	10	16	7	33	17	2	6	20	4	5	4
2009Simonson_052	Asia	Xinjiang,_China	Simonson2009	GT66	A.Br.Aust94	17	10	16	7	33	17	2	6	20	4	5	4
2009Simonson_053	Asia	Xinjiang,_China	Simonson2009	GT66	A.Br.Aust94	17	10	16	7	33	17	2	6	20	4	5	4
2009Simonson_054	Asia	Xinjiang,_China	Simonson2009	GT66	A.Br.Aust94	17	10	16	7	33	17	2	6	20	4	5	4
2009Simonson_060	Asia	Xinjiang,_China	Simonson2009	GT66	A.Br.Aust94	17	10	16	7	33	17	2	6	20	4	5	4
2007vanErt_091	Middle_East	Turkey	Van_Ert2007	GT42	A.Br.Aust94	18	10	16	7	44	17	2	6	20	4	4	4
2007vanErt_122	Europe	Norway	Van_Ert2007	GT70	A.Br.Vollum	19	10	16	7	48	17	2	6	20	5	4	4
2007vanErt_123	Asia	Pakistan	Van_Ert2007	GT69	A.Br.Vollum	19	10	16	7	48	17	2	6	20	5	4	4
2007vanErt_118	Europe	Switzerland	Van_Ert2007	GT75	A.Br.Vollum	20	10	16	7	48	21	2	6	20	5	4	4
2007vanErt_119	Asia	Pakistan	Van_Ert2007	GT74	A.Br.Vollum	20	10	16	7	48	21	2	6	20	5	4	4
2007vanErt_121	Europe	Switzerland	Van_Ert2007	GT72	A.Br.Vollum	20	10	16	7	48	21	2	6	20	5	4	4
2007vanErt_124	Asia	China	Van_Ert2007	GT73	A.Br.Vollum	20	10	16	7	48	21	2	6	20	5	4	4
2007vanErt_125	Europe	Ireland	Van_Ert2007	GT71	A.Br.Vollum	20	10	16	7	48	21	2	6	20	5	4	4
2007vanErt_126	Asia	China	Van_Ert2007	GT71	A.Br.Vollum	20	10	16	7	48	21	2	6	20	5	4	4
2009Simonson_002	Asia	Xinjiang,_China	Simonson2009	GT74	A.Br.Vollum	20	10	16	7	48	21	2	6	20	5	4	4
2009Simonson_003	Asia	Xinjiang,_China	Simonson2009	GT71	A.Br.Vollum	20	10	16	7	48	21	2	6	20	5	4	4
2009Simonson_004	Asia	Xinjiang,_China	Simonson2009	GT71	A.Br.Vollum	20	10	16	7	48	21	2	6	20	5	4	4
2009Simonson_005	Asia	Xinjiang,_China	Simonson2009	GT71	A.Br.Vollum	20	10	16	7	48	21	2	6	20	5	4	4
2009Simonson_006	Asia	Xinjiang,_China	Simonson2009	GT71	A.Br.Vollum	20	10	16	7	48	21	2	6	20	5	4	4
2009Simonson_007	Asia	Xinjiang,_China	Simonson2009	GT71	A.Br.Vollum	20	10	16	7	48	21	2	6	20	5	4	4
2009Simonson_008	Asia	Xinjiang,_China	Simonson2009	GT74	A.Br.Vollum	20	10	16	7	48	21	2	6	20	5	4	4
2009Simonson_009	Asia	Xinjiang,_China	Simonson2009	GT74	A.Br.Vollum	20	10	16	7	48	21	2	6	20	5	4	4
2009Simonson_010	Asia	Xinjiang,_China	Simonson2009	GT71	A.Br.Vollum	20	10	16	7	48	21	2	6	20	5	4	4
2009Simonson_011	Asia	Xinjiang,_China	Simonson2009	GT71	A.Br.Vollum	20	10	16	7	48	21	2	6	20	5	4	4
2009Simonson_012	Asia	Xinjiang,_China	Simonson2009	GT71	A.Br.Vollum	20	10	16	7	48	21	2	6	20	5	4	4
2009Simonson_013	Asia	Xinjiang,_China	Simonson2009	GT71	A.Br.Vollum	20	10	16	7	48	21	2	6	20	5	4	4
2009Simonson_014	Asia	Xinjiang,_China	Simonson2009	GT71	A.Br.Vollum	20	10	16	7	48	21	2	6	20	5	4	4
2009Simonson_015	Asia	Xinjiang,_China	Simonson2009	GT71	A.Br.Vollum	20	10	16	7	48	21	2	6	20	5	4	4
2009Simonson_016	Asia	Xinjiang,_China	Simonson2009	GT71	A.Br.Vollum	20	10	16	7	48	21	2	6	20	5	4	4
2007vanErt_120	Europe	Germany	Van_Ert2007	GT74	A.Br.Vollum	21	10	16	7	48	21	2	7	20	5	4	4
2012Beyer_101	Africa	Windport,_Namibia	Beyer2012	B_anthracis_20120_6	A.Br.Aust94	22	10	16	7	49	17	2	6	20	4	4	4
2007vanErt_035	Asia	China	Van_Ert2007	GT58	A.Br.001/002	23	10	16	7	53	17	2	5	20	4	4	5
2009Simonson_062	Asia	Jiangxi,_China	Simonson2009	GT58	A.Br.001/002	23	10	16	7	53	17	2	5	20	4	4	5
2007vanErt_049	Europe	Germany	Van_Ert2007	GT65	A.Br.001/002	24	10	16	7	53	17	2	5	4	4	3	5
2007vanErt_045	Asia	Indonesia	Van_Ert2007	GT63	A.Br.001/002	25	10	16	7	53	17	2	6	20	4	3	5
2009Simonson_105	Asia	Gansu,_China	Simonson2009	GT59	A.Br.001/002	25	10	16	7	53	17	2	6	20	4	3	5
2007vanErt_037	Asia	China	Van_Ert2007	GT58	A.Br.001/002	26	10	16	7	53	17	2	6	20	4	4	3
2009Simonson_085	Asia	Liaoning,_China	Simonson2009	GT58	A.Br.001/002	26	10	16	7	53	17	2	6	20	4	4	3
2007vanErt_028	Asia	China	Van_Ert2007	temp57	A.Br.001/002	27	10	16	7	53	17	2	6	20	4	4	5
2007vanErt_029	Asia	China	Van_Ert2007	temp7	A.Br.001/002	27	10	16	7	53	17	2	6	20	4	4	5
2007vanErt_030	Asia	China	Van_Ert2007	temp15	A.Br.001/002	27	10	16	7	53	17	2	6	20	4	4	5
2007vanErt_031	Asia	China	Van_Ert2007	GT59	A.Br.001/002	27	10	16	7	53	17	2	6	20	4	4	5
2007vanErt_032	Asia	China	Van_Ert2007	GT57	A.Br.001/002	27	10	16	7	53	17	2	6	20	4	4	5
2007vanErt_033	Asia	China	Van_Ert2007	temp42	A.Br.001/002	27	10	16	7	53	17	2	6	20	4	4	5
2007vanErt_038	America	Canada	Van_Ert2007	GT58	A.Br.001/002	27	10	16	7	53	17	2	6	20	4	4	5
2007vanErt_039	Asia	China	Van_Ert2007	temp59	A.Br.001/002	27	10	16	7	53	17	2	6	20	4	4	5
2007vanErt_040	Asia	China	Van_Ert2007	temp60	A.Br.001/002	27	10	16	7	53	17	2	6	20	4	4	5
2007vanErt_042	Asia	China	Van_Ert2007	GT59	A.Br.001/002	27	10	16	7	53	17	2	6	20	4	4	5
2007vanErt_043	Asia	China	Van_Ert2007	GT57	A.Br.001/002	27	10	16	7	53	17	2	6	20	4	4	5
2009Simonson_061	Asia	Changping,_China	Simonson2009	GT57	A.Br.001/002	27	10	16	7	53	17	2	6	20	4	4	5
2009Simonson_063	Asia	Henan,_China	Simonson2009	GT59	A.Br.001/002	27	10	16	7	53	17	2	6	20	4	4	5
2009Simonson_064	Asia	Henan,_China	Simonson2009	GT59	A.Br.001/002	27	10	16	7	53	17	2	6	20	4	4	5
2009Simonson_067	Asia	Qingdao,_China	Simonson2009	GT59	A.Br.001/002	27	10	16	7	53	17	2	6	20	4	4	5
2009Simonson_071	Asia	Qingdao,_China	Simonson2009	GT59	A.Br.001/002	27	10	16	7	53	17	2	6	20	4	4	5
2009Simonson_073	Asia	Qingdao,_China	Simonson2009	GT59	A.Br.001/002	27	10	16	7	53	17	2	6	20	4	4	5
2009Simonson_075	Asia	Qingdao,_China	Simonson2009	temp15	A.Br.001/002	27	10	16	7	53	17	2	6	20	4	4	5
2009Simonson_076	Asia	Hebei,_China	Simonson2009	GT57	A.Br.001/002	27	10	16	7	53	17	2	6	20	4	4	5
2009Simonson_077	Asia	Hebei,_China	Simonson2009	GT57	A.Br.001/002	27	10	16	7	53	17	2	6	20	4	4	5
2009Simonson_078	Asia	Hebei,_China	Simonson2009	GT57	A.Br.001/002	27	10	16	7	53	17	2	6	20	4	4	5
2009Simonson_080	Asia	Hebei,_China	Simonson2009	GT57	A.Br.001/002	27	10	16	7	53	17	2	6	20	4	4	5
2009Simonson_081	Asia	Hebei,_China	Simonson2009	GT57	A.Br.001/002	27	10	16	7	53	17	2	6	20	4	4	5
2009Simonson_082	Asia	Hebei,_China	Simonson2009	temp60	A.Br.001/002	27	10	16	7	53	17	2	6	20	4	4	5
2009Simonson_084	Asia	Liaoning,_China	Simonson2009	GT58	A.Br.001/002	27	10	16	7	53	17	2	6	20	4	4	5
2009Simonson_086	Asia	Liaoning,_China	Simonson2009	GT58	A.Br.001/002	27	10	16	7	53	17	2	6	20	4	4	5
2009Simonson_087	Asia	Liaoning,_China	Simonson2009	GT58	A.Br.001/002	27	10	16	7	53	17	2	6	20	4	4	5
2009Simonson_088	Asia	Liaoning,_China	Simonson2009	GT58	A.Br.001/002	27	10	16	7	53	17	2	6	20	4	4	5
2009Simonson_089	Asia	Liaoning,_China	Simonson2009	GT58	A.Br.001/002	27	10	16	7	53	17	2	6	20	4	4	5
2009Simonson_090	Asia	Liaoning,_China	Simonson2009	GT58	A.Br.001/002	27	10	16	7	53	17	2	6	20	4	4	5
2009Simonson_091	Asia	Liaoning,_China	Simonson2009	GT58	A.Br.001/002	27	10	16	7	53	17	2	6	20	4	4	5
2009Simonson_092	Asia	Liaoning,_China	Simonson2009	GT58	A.Br.001/002	27	10	16	7	53	17	2	6	20	4	4	5
2009Simonson_093	Asia	Liaoning,_China	Simonson2009	GT58	A.Br.001/002	27	10	16	7	53	17	2	6	20	4	4	5
2009Simonson_094	Asia	Liaoning,_China	Simonson2009	GT58	A.Br.001/002	27	10	16	7	53	17	2	6	20	4	4	5
2009Simonson_095	Asia	Liaoning,_China	Simonson2009	GT58	A.Br.001/002	27	10	16	7	53	17	2	6	20	4	4	5
2009Simonson_096	Asia	Liaoning,_China	Simonson2009	GT58	A.Br.001/002	27	10	16	7	53	17	2	6	20	4	4	5
2009Simonson_097	Asia	Liaoning,_China	Simonson2009	GT58	A.Br.001/002	27	10	16	7	53	17	2	6	20	4	4	5
2009Simonson_098	Asia	Liaoning,_China	Simonson2009	GT58	A.Br.001/002	27	10	16	7	53	17	2	6	20	4	4	5
2009Simonson_099	Asia	Inner_Mongolia,_China	Simonson2009	temp42	A.Br.001/002	27	10	16	7	53	17	2	6	20	4	4	5
2009Simonson_100	Asia	Inner_Mongolia,_China	Simonson2009	temp42	A.Br.001/002	27	10	16	7	53	17	2	6	20	4	4	5
2009Simonson_101	Asia	Inner_Mongolia,_China	Simonson2009	temp59	A.Br.001/002	27	10	16	7	53	17	2	6	20	4	4	5
2009Simonson_102	Asia	Inner_Mongolia,_China	Simonson2009	GT59	A.Br.001/002	27	10	16	7	53	17	2	6	20	4	4	5
2009Simonson_103	Asia	Inner_Mongolia,_China	Simonson2009	temp7	A.Br.001/002	27	10	16	7	53	17	2	6	20	4	4	5
2009Simonson_104	Asia	Inner_Mongolia,_China	Simonson2009	GT59	A.Br.001/002	27	10	16	7	53	17	2	6	20	4	4	5
2009Simonson_106	Asia	Gansu,_China	Simonson2009	GT59	A.Br.001/002	27	10	16	7	53	17	2	6	20	4	4	5
2009Simonson_107	Asia	Gansu,_China	Simonson2009	temp15	A.Br.001/002	27	10	16	7	53	17	2	6	20	4	4	5
2009Simonson_108	Asia	Gansu,_China	Simonson2009	temp7	A.Br.001/002	27	10	16	7	53	17	2	6	20	4	4	5
2009Simonson_109	Asia	Gansu,_China	Simonson2009	temp57	A.Br.001/002	27	10	16	7	53	17	2	6	20	4	4	5
2009Simonson_110	Asia	Gansu,_China	Simonson2009	temp15	A.Br.001/002	27	10	16	7	53	17	2	6	20	4	4	5
2009Simonson_112	Asia	Gansu,_China	Simonson2009	temp7	A.Br.001/002	27	10	16	7	53	17	2	6	20	4	4	5
2009Simonson_113	Asia	Sichuan,_China	Simonson2009	temp7	A.Br.001/002	27	10	16	7	53	17	2	6	20	4	4	5
2009Simonson_114	Asia	Xinjiang,_China	Simonson2009	temp15	A.Br.001/002	27	10	16	7	53	17	2	6	20	4	4	5
2009Simonson_115	Asia	Xinjiang,_China	Simonson2009	temp15	A.Br.001/002	27	10	16	7	53	17	2	6	20	4	4	5
2009Simonson_116	Asia	Xinjiang,_China	Simonson2009	temp15	A.Br.001/002	27	10	16	7	53	17	2	6	20	4	4	5
2009Simonson_117	Asia	Xinjiang,_China	Simonson2009	temp57	A.Br.001/002	27	10	16	7	53	17	2	6	20	4	4	5
2009Simonson_118	Asia	Xinjiang,_China	Simonson2009	temp57	A.Br.001/002	27	10	16	7	53	17	2	6	20	4	4	5
2009Simonson_119	Asia	Xinjiang,_China	Simonson2009	temp57	A.Br.001/002	27	10	16	7	53	17	2	6	20	4	4	5
2009Simonson_120	Asia	Xinjiang,_China	Simonson2009	GT57	A.Br.001/002	27	10	16	7	53	17	2	6	20	4	4	5
2009Simonson_135	Asia	Inner_Mongolia,_China	Simonson2009	GT59	A.Br.Ames	27	10	16	7	53	17	2	6	20	4	4	5
2009Simonson_136	Asia	Inner_Mongolia,_China	Simonson2009	temp15	A.Br.Ames	27	10	16	7	53	17	2	6	20	4	4	5
2009Simonson_137	Asia	Inner_Mongolia,_China	Simonson2009	GT59	A.Br.Ames	27	10	16	7	53	17	2	6	20	4	4	5
2009Simonson_138	Asia	Inner_Mongolia,_China	Simonson2009	GT59	A.Br.Ames	27	10	16	7	53	17	2	6	20	4	4	5
2007vanErt_047	Asia	Australia	Van_Ert2007	temp57	A.Br.001/002	28	10	16	7	53	17	2	6	4	4	3	5
2007vanErt_048	America	USA	Van_Ert2007	temp62	A.Br.001/002	28	10	16	7	53	17	2	6	4	4	3	5
2007vanErt_050	Europe	Germany	Van_Ert2007	GT61	A.Br.001/002	28	10	16	7	53	17	2	6	4	4	3	5
2007vanErt_052	Asia	Thailand	Van_Ert2007	temp63	A.Br.001/002	29	10	16	7	53	17	2	6	4	4	4	5
2007vanErt_036	Asia	China	Van_Ert2007	GT58	A.Br.001/002	30	10	16	7	53	17	2	8	20	4	4	5
2007vanErt_212	America	USA	Van_Ert2007	temp94	A.Br.WNA	31	10	16	7	57	17	1	6	21	5	4	4
2007vanErt_128	Asia	South_Korea	Van_Ert2007	temp3	A.Br.005/006	32	10	16	7	57	17	2	5	21	6	4	4
2007vanErt_131	Asia	South_Korea	Van_Ert2007	temp3	A.Br.005/006	32	10	16	7	57	17	2	5	21	6	4	4
2007vanErt_132	Asia	Indonesia	Van_Ert2007	GT31	A.Br.005/006	32	10	16	7	57	17	2	5	21	6	4	4
H9401	Asia	Korea	unk	temp3	A.Br.005/006	32	10	16	7	57	17	2	5	21	6	4	4
2007vanErt_129	Asia	Indonesia	Van_Ert2007	temp3	A.Br.005/006	33	10	16	7	57	17	2	5	4	6	4	4
2007vanErt_110	America	Argentina	Van_Ert2007	temp74	A.Br.003/004	35	10	16	7	57	17	2	6	19	4	4	4
2007vanErt_102	Africa	South_Africa	Van_Ert2007	GT45	A.Br.003/004	36	10	16	7	57	17	2	6	20	4	4	3
2007vanErt_064	Middle_East	Turkey	Van_Ert2007	GT44	A.Br.Aust94	37	10	16	7	57	17	2	6	20	4	4	4
2007vanErt_065	Middle_East	Turkey	Van_Ert2007	GT43	A.Br.Aust94	37	10	16	7	57	17	2	6	20	4	4	4
2007vanErt_068	Asia	India	Van_Ert2007	GT36	A.Br.Aust94	37	10	16	7	57	17	2	6	20	4	4	4
2007vanErt_069	America	USA	Van_Ert2007	GT39	A.Br.Aust94	37	10	16	7	57	17	2	6	20	4	4	4
2007vanErt_070	Africa	Namibia	Van_Ert2007	GT40	A.Br.Aust94	37	10	16	7	57	17	2	6	20	4	4	4
2007vanErt_071	Europe	Germany	Van_Ert2007	GT38	A.Br.Aust94	37	10	16	7	57	17	2	6	20	4	4	4
2007vanErt_072	Africa	Namibia	Van_Ert2007	GT35	A.Br.Aust94	37	10	16	7	57	17	2	6	20	4	4	4
2007vanErt_074	Africa	Namibia	Van_Ert2007	GT39	A.Br.Aust94	37	10	16	7	57	17	2	6	20	4	4	4
2007vanErt_075	Europe	UK	Van_Ert2007	GT47	A.Br.Aust94	37	10	16	7	57	17	2	6	20	4	4	4
2007vanErt_076	Europe	UK	Van_Ert2007	GT49	A.Br.Aust94	37	10	16	7	57	17	2	6	20	4	4	4
2007vanErt_085	Asia	India	Van_Ert2007	GT53	A.Br.Aust94	37	10	16	7	57	17	2	6	20	4	4	4
2007vanErt_086	Europe	UK	Van_Ert2007	GT50	A.Br.Aust94	37	10	16	7	57	17	2	6	20	4	4	4
2007vanErt_087	Europe	UK	Van_Ert2007	GT48	A.Br.Aust94	37	10	16	7	57	17	2	6	20	4	4	4
2007vanErt_089	Middle_East	Turkey	Van_Ert2007	GT37	A.Br.Aust94	37	10	16	7	57	17	2	6	20	4	4	4
2007vanErt_090	Middle_East	Turkey	Van_Ert2007	GT36	A.Br.Aust94	37	10	16	7	57	17	2	6	20	4	4	4
2007vanErt_094	Europe	Germany	Van_Ert2007	GT45	A.Br.Aust94	37	10	16	7	57	17	2	6	20	4	4	4
2007vanErt_096	Middle_East	Turkey	Van_Ert2007	GT35	A.Br.Aust94	37	10	16	7	57	17	2	6	20	4	4	4
2007vanErt_097	Africa	Namibia	Van_Ert2007	GT44	A.Br.Aust94	37	10	16	7	57	17	2	6	20	4	4	4
2007vanErt_098	Middle_East	Turkey	Van_Ert2007	temp71	A.Br.Aust94	37	10	16	7	57	17	2	6	20	4	4	4
2007vanErt_099	America	Argentina	Van_Ert2007	GT45	A.Br.003/004	37	10	16	7	57	17	2	6	20	4	4	4
2007vanErt_100	America	Argentina	Van_Ert2007	GT44	A.Br.003/004	37	10	16	7	57	17	2	6	20	4	4	4
2007vanErt_101	America	USA	Van_Ert2007	GT35	A.Br.003/004	37	10	16	7	57	17	2	6	20	4	4	4
2007vanErt_107	America	Argentina	Van_Ert2007	GT45	A.Br.003/004	37	10	16	7	57	17	2	6	20	4	4	4
2007vanErt_108	America	Argentina	Van_Ert2007	temp73	A.Br.003/004	37	10	16	7	57	17	2	6	20	4	4	4
2012Beyer_001	Africa	Gemsbokvlakte,_Namibia	Beyer2012	B_anthracis_20120_1	A.Br.Aust94	37	10	16	7	57	17	2	6	20	4	4	4
2012Beyer_002	Africa	Namibia	Beyer2012	B_anthracis_20120_1	A.Br.Aust94	37	10	16	7	57	17	2	6	20	4	4	4
2012Beyer_003	Africa	Gobaub,_Namibia	Beyer2012	B_anthracis_20120_1	A.Br.Aust94	37	10	16	7	57	17	2	6	20	4	4	4
2012Beyer_004	Africa	Gemsbokvlakte,_Namibia	Beyer2012	B_anthracis_20120_1	A.Br.Aust94	37	10	16	7	57	17	2	6	20	4	4	4
2012Beyer_005	Africa	Gemsbokvlakte,_Namibia	Beyer2012	B_anthracis_20120_1	A.Br.Aust94	37	10	16	7	57	17	2	6	20	4	4	4
2012Beyer_006	Africa	Namibia	Beyer2012	B_anthracis_20120_1	A.Br.Aust94	37	10	16	7	57	17	2	6	20	4	4	4
2012Beyer_007	Africa	Namibia	Beyer2012	B_anthracis_20120_1	A.Br.Aust94	37	10	16	7	57	17	2	6	20	4	4	4
2012Beyer_008	Africa	Namibia	Beyer2012	GT40	A.Br.Aust94	37	10	16	7	57	17	2	6	20	4	4	4
2012Beyer_009	Africa	Namibia	Beyer2012	GT43	A.Br.Aust94	37	10	16	7	57	17	2	6	20	4	4	4
2012Beyer_010	Africa	Namibia	Beyer2012	GT43	A.Br.Aust94	37	10	16	7	57	17	2	6	20	4	4	4
2012Beyer_011	Africa	Namibia	Beyer2012	B_anthracis_20120_1	A.Br.Aust94	37	10	16	7	57	17	2	6	20	4	4	4
2012Beyer_012	Africa	Pionierdam,_Namibia	Beyer2012	GT40	A.Br.Aust94	37	10	16	7	57	17	2	6	20	4	4	4
2012Beyer_013	Africa	Duikerdrink,_Namibia	Beyer2012	GT40	A.Br.Aust94	37	10	16	7	57	17	2	6	20	4	4	4
2012Beyer_014	Africa	Namutoni,_Namibia	Beyer2012	GT40	A.Br.Aust94	37	10	16	7	57	17	2	6	20	4	4	4
2012Beyer_016	Africa	Namibia	Beyer2012	B_anthracis_20120_1	A.Br.Aust94	37	10	16	7	57	17	2	6	20	4	4	4
2012Beyer_017	Africa	Namibia	Beyer2012	B_anthracis_20120_1	A.Br.Aust94	37	10	16	7	57	17	2	6	20	4	4	4
2012Beyer_018	Africa	Okondeka,_Namibia	Beyer2012	B_anthracis_20120_1	A.Br.Aust94	37	10	16	7	57	17	2	6	20	4	4	4
2012Beyer_020	Africa	Dolomietpunt,_Namibia	Beyer2012	B_anthracis_20120_1	A.Br.Aust94	37	10	16	7	57	17	2	6	20	4	4	4
2012Beyer_021	Africa	Dolomietpunt,_Namibia	Beyer2012	B_anthracis_20120_1	A.Br.Aust94	37	10	16	7	57	17	2	6	20	4	4	4
2012Beyer_022	Africa	Namibia	Beyer2012	B_anthracis_20120_1	A.Br.Aust94	37	10	16	7	57	17	2	6	20	4	4	4
2012Beyer_023	Africa	Chudop,_Namibia	Beyer2012	B_anthracis_20120_1	A.Br.Aust94	37	10	16	7	57	17	2	6	20	4	4	4
2012Beyer_024	Africa	Okawao,_Namibia	Beyer2012	GT40	A.Br.Aust94	37	10	16	7	57	17	2	6	20	4	4	4
2012Beyer_025	Africa	Tobieroen,_Namibia	Beyer2012	GT40	A.Br.Aust94	37	10	16	7	57	17	2	6	20	4	4	4
2012Beyer_026	Africa	Tobieroen,_Namibia	Beyer2012	GT40	A.Br.Aust94	37	10	16	7	57	17	2	6	20	4	4	4
2012Beyer_027	Africa	Tobieroen,_Namibia	Beyer2012	GT40	A.Br.Aust94	37	10	16	7	57	17	2	6	20	4	4	4
2012Beyer_028	Africa	Nerens,_Namibia	Beyer2012	GT40	A.Br.Aust94	37	10	16	7	57	17	2	6	20	4	4	4
2012Beyer_029	Africa	Nerens,_Namibia	Beyer2012	GT40	A.Br.Aust94	37	10	16	7	57	17	2	6	20	4	4	4
2012Beyer_030	Africa	Nerens,_Namibia	Beyer2012	GT40	A.Br.Aust94	37	10	16	7	57	17	2	6	20	4	4	4
2012Beyer_031	Africa	Namibia	Beyer2012	GT40	A.Br.Aust94	37	10	16	7	57	17	2	6	20	4	4	4
2012Beyer_032	Africa	Tobieroen,_Namibia	Beyer2012	GT35	A.Br.Aust94	37	10	16	7	57	17	2	6	20	4	4	4
2012Beyer_033	Africa	Namibia	Beyer2012	B_anthracis_20120_1	A.Br.Aust94	37	10	16	7	57	17	2	6	20	4	4	4
2012Beyer_034	Africa	Halali,_Namibia	Beyer2012	GT43	A.Br.Aust94	37	10	16	7	57	17	2	6	20	4	4	4
2012Beyer_035	Africa	Okondeka,_Namibia	Beyer2012	GT43	A.Br.Aust94	37	10	16	7	57	17	2	6	20	4	4	4
2012Beyer_036	Africa	Namutoni,_Namibia	Beyer2012	GT43	A.Br.Aust94	37	10	16	7	57	17	2	6	20	4	4	4
2012Beyer_037	Africa	Wolfsne,_Namibia	Beyer2012	B_anthracis_20120_1	A.Br.Aust94	37	10	16	7	57	17	2	6	20	4	4	4
2012Beyer_039	Africa	Namutoni,_Namibia	Beyer2012	B_anthracis_20120_1	A.Br.Aust94	37	10	16	7	57	17	2	6	20	4	4	4
2012Beyer_040	Africa	Namutoni,_Namibia	Beyer2012	B_anthracis_20120_1	A.Br.Aust94	37	10	16	7	57	17	2	6	20	4	4	4
2012Beyer_041	Africa	Namutoni,_Namibia	Beyer2012	B_anthracis_20120_1	A.Br.Aust94	37	10	16	7	57	17	2	6	20	4	4	4
2012Beyer_043	Africa	Chudop,_Namibia	Beyer2012	B_anthracis_20120_1	A.Br.Aust94	37	10	16	7	57	17	2	6	20	4	4	4
2012Beyer_044	Africa	Namutoni,_Namibia	Beyer2012	B_anthracis_20120_1	A.Br.Aust94	37	10	16	7	57	17	2	6	20	4	4	4
2012Beyer_045	Africa	Namibia	Beyer2012	B_anthracis_20120_1	A.Br.Aust94	37	10	16	7	57	17	2	6	20	4	4	4
2012Beyer_046	Africa	Susuwe,_Namibia	Beyer2012	B_anthracis_20120_1	A.Br.Aust94	37	10	16	7	57	17	2	6	20	4	4	4
2012Beyer_051	Africa	Twee_Palms,_Namibia	Beyer2012	B_anthracis_20120_2	A.Br.Aust94	37	10	16	7	57	17	2	6	20	4	4	4
2012Beyer_052	Africa	Namutoni,_Namibia	Beyer2012	GT43	A.Br.Aust94	37	10	16	7	57	17	2	6	20	4	4	4
2012Beyer_053	Africa	Twee_Palms,_Namibia	Beyer2012	GT43	A.Br.Aust94	37	10	16	7	57	17	2	6	20	4	4	4
2012Beyer_054	Africa	Namutoni,_Namibia	Beyer2012	GT47	A.Br.Aust94	37	10	16	7	57	17	2	6	20	4	4	4
2012Beyer_055	Africa	Namutoni,_Namibia	Beyer2012	B_anthracis_20120_1	A.Br.Aust94	37	10	16	7	57	17	2	6	20	4	4	4
2012Beyer_056	Africa	Namutoni,_Namibia	Beyer2012	GT40	A.Br.Aust94	37	10	16	7	57	17	2	6	20	4	4	4
2012Beyer_057	Africa	Koinachas,_Namibia	Beyer2012	B_anthracis_20120_1	A.Br.Aust94	37	10	16	7	57	17	2	6	20	4	4	4
2012Beyer_059	Africa	Ombika,_Namibia	Beyer2012	B_anthracis_20120_1	A.Br.Aust94	37	10	16	7	57	17	2	6	20	4	4	4
2012Beyer_060	Africa	Gobaub,_Namibia	Beyer2012	B_anthracis_20120_1	A.Br.Aust94	37	10	16	7	57	17	2	6	20	4	4	4
2012Beyer_061	Africa	Halali,_Namibia	Beyer2012	B_anthracis_20120_1	A.Br.Aust94	37	10	16	7	57	17	2	6	20	4	4	4
2012Beyer_062	Africa	Halali,_Namibia	Beyer2012	GT40	A.Br.Aust94	37	10	16	7	57	17	2	6	20	4	4	4
2012Beyer_063	Africa	Okambara,_Namibia	Beyer2012	GT44	A.Br.Aust94	37	10	16	7	57	17	2	6	20	4	4	4
2012Beyer_064	Africa	Okondeka,_Namibia	Beyer2012	B_anthracis_20120_1	A.Br.Aust94	37	10	16	7	57	17	2	6	20	4	4	4
2012Beyer_066	Africa	Sonderkop,_Namibia	Beyer2012	B_anthracis_20120_2	A.Br.Aust94	37	10	16	7	57	17	2	6	20	4	4	4
2012Beyer_067	Africa	Okaukuejo,_Namibia	Beyer2012	GT35	A.Br.Aust94	37	10	16	7	57	17	2	6	20	4	4	4
2012Beyer_072	Africa	Otjiwarongo,_Namibia	Beyer2012	GT36	A.Br.Aust94	37	10	16	7	57	17	2	6	20	4	4	4
2012Beyer_073	Africa	Bergzicht,_Namibia	Beyer2012	GT36	A.Br.Aust94	37	10	16	7	57	17	2	6	20	4	4	4
2012Beyer_074	Africa	Gobabis,_Namibia	Beyer2012	GT36	A.Br.Aust94	37	10	16	7	57	17	2	6	20	4	4	4
2012Beyer_075	Africa	Natalia,_Namibia	Beyer2012	GT37	A.Br.Aust94	37	10	16	7	57	17	2	6	20	4	4	4
2012Beyer_076	Africa	Outjo,_Namibia	Beyer2012	GT40	A.Br.Aust94	37	10	16	7	57	17	2	6	20	4	4	4
2012Beyer_077	Africa	Sangaree,_Namibia	Beyer2012	GT40	A.Br.Aust94	37	10	16	7	57	17	2	6	20	4	4	4
2012Beyer_080	Africa	Wolfsnes,_Namibia	Beyer2012	GT40	A.Br.Aust94	37	10	16	7	57	17	2	6	20	4	4	4
2012Beyer_081	Africa	Andoni_Plains,_Namibia	Beyer2012	GT40	A.Br.Aust94	37	10	16	7	57	17	2	6	20	4	4	4
2012Beyer_082	Africa	Andoni_Plains,_Namibia	Beyer2012	GT40	A.Br.Aust94	37	10	16	7	57	17	2	6	20	4	4	4
2012Beyer_083	Africa	Andoni_Plains,_Namibia	Beyer2012	GT40	A.Br.Aust94	37	10	16	7	57	17	2	6	20	4	4	4
2012Beyer_084	Africa	Andoni_Plains,_Namibia	Beyer2012	GT40	A.Br.Aust94	37	10	16	7	57	17	2	6	20	4	4	4
2012Beyer_085	Africa	Andoni_Plains,_Namibia	Beyer2012	GT40	A.Br.Aust94	37	10	16	7	57	17	2	6	20	4	4	4
2012Beyer_086	Africa	Andoni_Plains,_Namibia	Beyer2012	GT40	A.Br.Aust94	37	10	16	7	57	17	2	6	20	4	4	4
2012Beyer_087	Africa	Mushara,_Namibia	Beyer2012	GT40	A.Br.Aust94	37	10	16	7	57	17	2	6	20	4	4	4
2012Beyer_088	Africa	Goas,_Namibia	Beyer2012	GT40	A.Br.Aust94	37	10	16	7	57	17	2	6	20	4	4	4
2012Beyer_089	Africa	Okaukuejo,_Namibia	Beyer2012	GT40	A.Br.Aust94	37	10	16	7	57	17	2	6	20	4	4	4
2012Beyer_090	Africa	Okondeka,_Namibia	Beyer2012	GT40	A.Br.Aust94	37	10	16	7	57	17	2	6	20	4	4	4
2012Beyer_091	Africa	Nebrowni,_Namibia	Beyer2012	GT40	A.Br.Aust94	37	10	16	7	57	17	2	6	20	4	4	4
2012Beyer_092	Africa	Sangaree,_Namibia	Beyer2012	GT40	A.Br.Aust94	37	10	16	7	57	17	2	6	20	4	4	4
2012Beyer_093	Africa	Sangaree,_Namibia	Beyer2012	GT40	A.Br.Aust94	37	10	16	7	57	17	2	6	20	4	4	4
2012Beyer_094	Africa	Sangaree,_Namibia	Beyer2012	GT40	A.Br.Aust94	37	10	16	7	57	17	2	6	20	4	4	4
2012Beyer_095	Africa	Epacha,_Namibia	Beyer2012	GT40	A.Br.Aust94	37	10	16	7	57	17	2	6	20	4	4	4
2012Beyer_098	Africa	Springbokvlakte,_Namibia	Beyer2012	GT44	A.Br.Aust94	37	10	16	7	57	17	2	6	20	4	4	4
2012Beyer_099	Africa	Okondeka,_Namibia	Beyer2012	B_anthracis_20120_1	A.Br.Aust94	37	10	16	7	57	17	2	6	20	4	4	4
2012Beyer_100	Africa	Okondeka,_Namibia	Beyer2012	B_anthracis_20120_2	A.Br.Aust94	37	10	16	7	57	17	2	6	20	4	4	4
2012Beyer_102	Africa	Okaukuejo,_Namibia	Beyer2012	GT36	A.Br.Aust94	37	10	16	7	57	17	2	6	20	4	4	4
2012Beyer_103	Africa	Okondeka,_Namibia	Beyer2012	GT36	A.Br.Aust94	37	10	16	7	57	17	2	6	20	4	4	4
2012Beyer_104	Africa	Okondeka,_Namibia	Beyer2012	GT36	A.Br.Aust94	37	10	16	7	57	17	2	6	20	4	4	4
2012Beyer_105	Africa	Leeubron,_Namibia	Beyer2012	GT36	A.Br.Aust94	37	10	16	7	57	17	2	6	20	4	4	4
2012Beyer_106	Africa	Bergzicht,_Namibia	Beyer2012	GT36	A.Br.Aust94	37	10	16	7	57	17	2	6	20	4	4	4
2012Beyer_107	Africa	Neu_Otjisororindi,_Namibia	Beyer2012	GT36	A.Br.Aust94	37	10	16	7	57	17	2	6	20	4	4	4
2012Beyer_108	Africa	Neu_Otjisororindi,_Namibia	Beyer2012	GT36	A.Br.Aust94	37	10	16	7	57	17	2	6	20	4	4	4
2012Beyer_109	Africa	Nuwe_Orde,_Namibia	Beyer2012	GT36	A.Br.Aust94	37	10	16	7	57	17	2	6	20	4	4	4
2012Beyer_110	Africa	Aus,_Namibia	Beyer2012	GT35	A.Br.Aust94	37	10	16	7	57	17	2	6	20	4	4	4
2012Beyer_111	Africa	Okaukuejo,_Namibia	Beyer2012	GT40	A.Br.Aust94	37	10	16	7	57	17	2	6	20	4	4	4
2012Beyer_112	Africa	Leeubron,_Namibia	Beyer2012	B_anthracis_20120_1	A.Br.Aust94	37	10	16	7	57	17	2	6	20	4	4	4
2012Beyer_113	Africa	Leeubron,_Namibia	Beyer2012	B_anthracis_20120_1	A.Br.Aust94	37	10	16	7	57	17	2	6	20	4	4	4
2012Beyer_114	Africa	Adamax,_Namibia	Beyer2012	B_anthracis_20120_1	A.Br.Aust94	37	10	16	7	57	17	2	6	20	4	4	4
2012Beyer_115	Africa	Natco,_Namibia	Beyer2012	B_anthracis_20120_1	A.Br.Aust94	37	10	16	7	57	17	2	6	20	4	4	4
2012Beyer_116	Africa	Leeubron,_Namibia	Beyer2012	B_anthracis_20120_1	A.Br.Aust94	37	10	16	7	57	17	2	6	20	4	4	4
2012Beyer_117	Africa	Okondeka,_Namibia	Beyer2012	B_anthracis_20120_1	A.Br.Aust94	37	10	16	7	57	17	2	6	20	4	4	4
2012Beyer_118	Africa	Okondeka,_Namibia	Beyer2012	B_anthracis_20120_1	A.Br.Aust94	37	10	16	7	57	17	2	6	20	4	4	4
2012Beyer_119	Africa	Leeubron,_Namibia	Beyer2012	B_anthracis_20120_1	A.Br.Aust94	37	10	16	7	57	17	2	6	20	4	4	4
2012Beyer_120	Africa	Leeubron,_Namibia	Beyer2012	B_anthracis_20120_1	A.Br.Aust94	37	10	16	7	57	17	2	6	20	4	4	4
2012Beyer_121	Africa	Leeubron,_Namibia	Beyer2012	B_anthracis_20120_1	A.Br.Aust94	37	10	16	7	57	17	2	6	20	4	4	4
2012Beyer_122	Africa	Adamax,_Namibia	Beyer2012	B_anthracis_20120_1	A.Br.Aust94	37	10	16	7	57	17	2	6	20	4	4	4
2012Beyer_123	Africa	Adamax,_Namibia	Beyer2012	B_anthracis_20120_1	A.Br.Aust94	37	10	16	7	57	17	2	6	20	4	4	4
2012Beyer_124	Africa	Leeubron,_Namibia	Beyer2012	B_anthracis_20120_1	A.Br.Aust94	37	10	16	7	57	17	2	6	20	4	4	4
2012Beyer_125	Africa	Namutoni,_Namibia	Beyer2012	B_anthracis_20120_1	A.Br.Aust94	37	10	16	7	57	17	2	6	20	4	4	4
2012Beyer_126	Africa	Natco,_Namibia	Beyer2012	B_anthracis_20120_1	A.Br.Aust94	37	10	16	7	57	17	2	6	20	4	4	4
2012Beyer_127	Africa	Okondeka,_Namibia	Beyer2012	B_anthracis_20120_1	A.Br.Aust94	37	10	16	7	57	17	2	6	20	4	4	4
2012Beyer_128	Africa	Dolomietpunt,_Namibia	Beyer2012	B_anthracis_20120_1	A.Br.Aust94	37	10	16	7	57	17	2	6	20	4	4	4
2012Beyer_129	Africa	Gemsbokvlakte,_Namibia	Beyer2012	B_anthracis_20120_1	A.Br.Aust94	37	10	16	7	57	17	2	6	20	4	4	4
2012Beyer_130	Africa	Okaukuejo,_Namibia	Beyer2012	B_anthracis_20120_1	A.Br.Aust94	37	10	16	7	57	17	2	6	20	4	4	4
2012Beyer_131	Africa	Okaukuejo,_Namibia	Beyer2012	B_anthracis_20120_1	A.Br.Aust94	37	10	16	7	57	17	2	6	20	4	4	4
2012Beyer_132	Africa	Adamax,_Namibia	Beyer2012	B_anthracis_20120_2	A.Br.Aust94	37	10	16	7	57	17	2	6	20	4	4	4
2012Beyer_133	Africa	Leeubron,_Namibia	Beyer2012	B_anthracis_20120_2	A.Br.Aust94	37	10	16	7	57	17	2	6	20	4	4	4
2012Beyer_134	Africa	Namibia	Beyer2012	B_anthracis_20120_2	A.Br.Aust94	37	10	16	7	57	17	2	6	20	4	4	4
2012Beyer_135	Africa	Epacha,_Namibia	Beyer2012	B_anthracis_20120_2	A.Br.Aust94	37	10	16	7	57	17	2	6	20	4	4	4
2012Beyer_136	Africa	Olifantstrek,_Namibia	Beyer2012	B_anthracis_20120_2	A.Br.Aust94	37	10	16	7	57	17	2	6	20	4	4	4
2012Beyer_137	Africa	Okaukuejo,_Namibia	Beyer2012	B_anthracis_20120_2	A.Br.Aust94	37	10	16	7	57	17	2	6	20	4	4	4
2012Beyer_138	Africa	Okaukuejo,_Namibia	Beyer2012	B_anthracis_20120_2	A.Br.Aust94	37	10	16	7	57	17	2	6	20	4	4	4
2012Beyer_139	Africa	Adamax,_Namibia	Beyer2012	GT40	A.Br.Aust94	37	10	16	7	57	17	2	6	20	4	4	4
2012Beyer_140	Africa	Okaukuejo,_Namibia	Beyer2012	GT40	A.Br.Aust94	37	10	16	7	57	17	2	6	20	4	4	4
2012Beyer_142	Africa	Leeubron,_Namibia	Beyer2012	GT43	A.Br.Aust94	37	10	16	7	57	17	2	6	20	4	4	4
2012Beyer_143	Africa	Namibia	Beyer2012	GT43	A.Br.Aust94	37	10	16	7	57	17	2	6	20	4	4	4
2012Beyer_144	Africa	Okaukuejo,_Namibia	Beyer2012	B_anthracis_20120_1	A.Br.Aust94	37	10	16	7	57	17	2	6	20	4	4	4
2012Beyer_145	Africa	Namibia	Beyer2012	B_anthracis_20120_1	A.Br.Aust94	37	10	16	7	57	17	2	6	20	4	4	4
2012Beyer_146	Africa	Leeubron,_Namibia	Beyer2012	B_anthracis_20120_1	A.Br.Aust94	37	10	16	7	57	17	2	6	20	4	4	4
2012Beyer_147	Africa	Eindpaal,_Namibia	Beyer2012	B_anthracis_20120_1	A.Br.Aust94	37	10	16	7	57	17	2	6	20	4	4	4
2012Beyer_148	Africa	Leeubron,_Namibia	Beyer2012	B_anthracis_20120_1	A.Br.Aust94	37	10	16	7	57	17	2	6	20	4	4	4
2012Beyer_149	Africa	Okondeka,_Namibia	Beyer2012	B_anthracis_20120_1	A.Br.Aust94	37	10	16	7	57	17	2	6	20	4	4	4
2012Beyer_150	Africa	Namibia	Beyer2012	B_anthracis_20120_1	A.Br.Aust94	37	10	16	7	57	17	2	6	20	4	4	4
2012Beyer_151	Africa	Okaukuejo,_Namibia	Beyer2012	B_anthracis_20120_1	A.Br.Aust94	37	10	16	7	57	17	2	6	20	4	4	4
2012Beyer_152	Africa	Adamax,_Namibia	Beyer2012	B_anthracis_20120_1	A.Br.Aust94	37	10	16	7	57	17	2	6	20	4	4	4
2012Beyer_153	Africa	Duineveld,_Namibia	Beyer2012	B_anthracis_20120_1	A.Br.Aust94	37	10	16	7	57	17	2	6	20	4	4	4
2012Beyer_154	Africa	Okaukuejo,_Namibia	Beyer2012	B_anthracis_20120_7	A.Br.Aust94	37	10	16	7	57	17	2	6	20	4	4	4
2012Beyer_155	Africa	Windport,_Namibia	Beyer2012	B_anthracis_20120_7	A.Br.Aust94	37	10	16	7	57	17	2	6	20	4	4	4
2012Beyer_157	Africa	Windport,_Namibia	Beyer2012	B_anthracis_20120_2	A.Br.Aust94	37	10	16	7	57	17	2	6	20	4	4	4
2012Beyer_158	Africa	Namibia	Beyer2012	B_anthracis_20120_2	A.Br.Aust94	37	10	16	7	57	17	2	6	20	4	4	4
2012Beyer_159	Africa	Gobabis,_Namibia	Beyer2012	GT47	A.Br.Aust94	37	10	16	7	57	17	2	6	20	4	4	4
2012Beyer_160	Africa	Leeubron,_Namibia	Beyer2012	B_anthracis_20120_1	A.Br.Aust94	37	10	16	7	57	17	2	6	20	4	4	4
2012Beyer_161	Africa	Leeubron,_Namibia	Beyer2012	B_anthracis_20120_1	A.Br.Aust94	37	10	16	7	57	17	2	6	20	4	4	4
2012Beyer_162	Africa	Natco,_Namibia	Beyer2012	B_anthracis_20120_1	A.Br.Aust94	37	10	16	7	57	17	2	6	20	4	4	4
2012Beyer_163	Africa	Natco,_Namibia	Beyer2012	B_anthracis_20120_1	A.Br.Aust94	37	10	16	7	57	17	2	6	20	4	4	4
2012Beyer_164	Africa	Leeuboss,_Namibia	Beyer2012	B_anthracis_20120_1	A.Br.Aust94	37	10	16	7	57	17	2	6	20	4	4	4
2012Beyer_165	Africa	Leeubron,_Namibia	Beyer2012	B_anthracis_20120_1	A.Br.Aust94	37	10	16	7	57	17	2	6	20	4	4	4
2012Beyer_166	Africa	Gaseb,_Namibia	Beyer2012	B_anthracis_20120_1	A.Br.Aust94	37	10	16	7	57	17	2	6	20	4	4	4
2012Beyer_167	Africa	Leeubron,_Namibia	Beyer2012	B_anthracis_20120_1	A.Br.Aust94	37	10	16	7	57	17	2	6	20	4	4	4
2012Beyer_168	Africa	Namutoni,_Namibia	Beyer2012	B_anthracis_20120_1	A.Br.Aust94	37	10	16	7	57	17	2	6	20	4	4	4
2012Beyer_169	Africa	Okaukuejo,_Namibia	Beyer2012	B_anthracis_20120_1	A.Br.Aust94	37	10	16	7	57	17	2	6	20	4	4	4
2012Beyer_170	Africa	Gemsbokvlakte,_Namibia	Beyer2012	B_anthracis_20120_1	A.Br.Aust94	37	10	16	7	57	17	2	6	20	4	4	4
2012Beyer_171	Africa	Nao_Obes,_Namibia	Beyer2012	B_anthracis_20120_1	A.Br.Aust94	37	10	16	7	57	17	2	6	20	4	4	4
2012Beyer_172	Africa	Leeuboss,_Namibia	Beyer2012	B_anthracis_20120_1	A.Br.Aust94	37	10	16	7	57	17	2	6	20	4	4	4
2012Beyer_173	Africa	Aroe,_Namibia	Beyer2012	B_anthracis_20120_1	A.Br.Aust94	37	10	16	7	57	17	2	6	20	4	4	4
2012Beyer_174	Africa	Okaukuejo,_Namibia	Beyer2012	B_anthracis_20120_1	A.Br.Aust94	37	10	16	7	57	17	2	6	20	4	4	4
2012Beyer_175	Africa	Okaukuejo,_Namibia	Beyer2012	B_anthracis_20120_1	A.Br.Aust94	37	10	16	7	57	17	2	6	20	4	4	4
2012Beyer_176	Africa	Okashana,_Namibia	Beyer2012	B_anthracis_20120_1	A.Br.Aust94	37	10	16	7	57	17	2	6	20	4	4	4
2012Beyer_177	Africa	Namibia	Beyer2012	B_anthracis_20120_1	A.Br.Aust94	37	10	16	7	57	17	2	6	20	4	4	4
2012Beyer_178	Africa	Nebrowni,_Namibia	Beyer2012	B_anthracis_20120_1	A.Br.Aust94	37	10	16	7	57	17	2	6	20	4	4	4
2012Beyer_179	Africa	Halali,_Namibia	Beyer2012	B_anthracis_20120_1	A.Br.Aust94	37	10	16	7	57	17	2	6	20	4	4	4
2012Beyer_180	Africa	Twee_Palms,_Namibia	Beyer2012	B_anthracis_20120_1	A.Br.Aust94	37	10	16	7	57	17	2	6	20	4	4	4
2012Beyer_181	Africa	Gemsbokvlakte,_Namibia	Beyer2012	B_anthracis_20120_1	A.Br.Aust94	37	10	16	7	57	17	2	6	20	4	4	4
2012Beyer_182	Africa	Nebrowni,_Namibia	Beyer2012	B_anthracis_20120_1	A.Br.Aust94	37	10	16	7	57	17	2	6	20	4	4	4
2012Beyer_183	Africa	Natco,_Namibia	Beyer2012	B_anthracis_20120_1	A.Br.Aust94	37	10	16	7	57	17	2	6	20	4	4	4
2012Beyer_184	Africa	Namibia	Beyer2012	B_anthracis_20120_1	A.Br.Aust94	37	10	16	7	57	17	2	6	20	4	4	4
2012Beyer_185	Africa	Wolfsnes,_Namibia	Beyer2012	B_anthracis_20120_2	A.Br.Aust94	37	10	16	7	57	17	2	6	20	4	4	4
2012Beyer_186	Africa	Natco,_Namibia	Beyer2012	B_anthracis_20120_2	A.Br.Aust94	37	10	16	7	57	17	2	6	20	4	4	4
2012Beyer_187	Africa	Wolfsnes,_Namibia	Beyer2012	B_anthracis_20120_2	A.Br.Aust94	37	10	16	7	57	17	2	6	20	4	4	4
2012Beyer_188	Africa	Okaukuejo,_Namibia	Beyer2012	B_anthracis_20120_2	A.Br.Aust94	37	10	16	7	57	17	2	6	20	4	4	4
2012Beyer_189	Africa	Gemsbokvlakte,_Namibia	Beyer2012	B_anthracis_20120_2	A.Br.Aust94	37	10	16	7	57	17	2	6	20	4	4	4
2012Beyer_190	Africa	Eindpaal,_Namibia	Beyer2012	B_anthracis_20120_2	A.Br.Aust94	37	10	16	7	57	17	2	6	20	4	4	4
2012Beyer_191	Africa	Okakukuejo,_Namibia	Beyer2012	B_anthracis_20120_2	A.Br.Aust94	37	10	16	7	57	17	2	6	20	4	4	4
2012Beyer_192	Africa	Kwema,_Namibia	Beyer2012	B_anthracis_20120_2	A.Br.Aust94	37	10	16	7	57	17	2	6	20	4	4	4
2012Beyer_193	Africa	Okaukuejo,_Namibia	Beyer2012	B_anthracis_20120_2	A.Br.Aust94	37	10	16	7	57	17	2	6	20	4	4	4
2012Beyer_194	Africa	Okaukuejo,_Namibia	Beyer2012	B_anthracis_20120_2	A.Br.Aust94	37	10	16	7	57	17	2	6	20	4	4	4
2012Beyer_195	Africa	Natco,_Namibia	Beyer2012	B_anthracis_20120_2	A.Br.Aust94	37	10	16	7	57	17	2	6	20	4	4	4
2012Beyer_196	Africa	Leeubron,_Namibia	Beyer2012	GT43	A.Br.Aust94	37	10	16	7	57	17	2	6	20	4	4	4
2012Beyer_197	Africa	Leeubron,_Namibia	Beyer2012	GT43	A.Br.Aust94	37	10	16	7	57	17	2	6	20	4	4	4
2012Beyer_198	Africa	Leeubron,_Namibia	Beyer2012	GT43	A.Br.Aust94	37	10	16	7	57	17	2	6	20	4	4	4
2012Beyer_199	Africa	Okaukuejo,_Namibia	Beyer2012	GT43	A.Br.Aust94	37	10	16	7	57	17	2	6	20	4	4	4
2012Beyer_200	Africa	Okondeka,_Namibia	Beyer2012	GT43	A.Br.Aust94	37	10	16	7	57	17	2	6	20	4	4	4
2012Beyer_201	Africa	Okaukuejo,_Namibia	Beyer2012	B_anthracis_20120_1	A.Br.Aust94	37	10	16	7	57	17	2	6	20	4	4	4
2012Beyer_202	Africa	Leeubron,_Namibia	Beyer2012	B_anthracis_20120_1	A.Br.Aust94	37	10	16	7	57	17	2	6	20	4	4	4
2012Beyer_203	Africa	Adamax,_Namibia	Beyer2012	B_anthracis_20120_1	A.Br.Aust94	37	10	16	7	57	17	2	6	20	4	4	4
2012Beyer_204	Africa	Adamax,_Namibia	Beyer2012	B_anthracis_20120_1	A.Br.Aust94	37	10	16	7	57	17	2	6	20	4	4	4
2012Beyer_205	Africa	Wolfsnes,_Namibia	Beyer2012	B_anthracis_20120_1	A.Br.Aust94	37	10	16	7	57	17	2	6	20	4	4	4
2012Beyer_206	Africa	Okaukuejo,_Namibia	Beyer2012	B_anthracis_20120_1	A.Br.Aust94	37	10	16	7	57	17	2	6	20	4	4	4
2012Beyer_207	Africa	Leeubron,_Namibia	Beyer2012	B_anthracis_20120_1	A.Br.Aust94	37	10	16	7	57	17	2	6	20	4	4	4
2012Beyer_208	Africa	Okaukuejo,_Namibia	Beyer2012	B_anthracis_20120_1	A.Br.Aust94	37	10	16	7	57	17	2	6	20	4	4	4
2012Beyer_209	Africa	Leeubron,_Namibia	Beyer2012	B_anthracis_20120_1	A.Br.Aust94	37	10	16	7	57	17	2	6	20	4	4	4
2012Beyer_210	Africa	Leeubron,_Namibia	Beyer2012	B_anthracis_20120_1	A.Br.Aust94	37	10	16	7	57	17	2	6	20	4	4	4
2012Beyer_211	Africa	Leeubron,_Namibia	Beyer2012	B_anthracis_20120_1	A.Br.Aust94	37	10	16	7	57	17	2	6	20	4	4	4
2012Beyer_212	Africa	Namibia	Beyer2012	B_anthracis_20120_1	A.Br.Aust94	37	10	16	7	57	17	2	6	20	4	4	4
2012Beyer_213	Africa	Leeubron,_Namibia	Beyer2012	B_anthracis_20120_1	A.Br.Aust94	37	10	16	7	57	17	2	6	20	4	4	4
2012Beyer_214	Africa	Leeubron,_Namibia	Beyer2012	B_anthracis_20120_1	A.Br.Aust94	37	10	16	7	57	17	2	6	20	4	4	4
2012Beyer_215	Africa	Okaukuejo,_Namibia	Beyer2012	B_anthracis_20120_1	A.Br.Aust94	37	10	16	7	57	17	2	6	20	4	4	4
2012Beyer_216	Africa	Namibia	Beyer2012	B_anthracis_20120_1	A.Br.Aust94	37	10	16	7	57	17	2	6	20	4	4	4
2012Beyer_217	Africa	Okaukuejo,_Namibia	Beyer2012	B_anthracis_20120_1	A.Br.Aust94	37	10	16	7	57	17	2	6	20	4	4	4
2012Beyer_218	Africa	Namibia	Beyer2012	B_anthracis_20120_1	A.Br.Aust94	37	10	16	7	57	17	2	6	20	4	4	4
2012Beyer_219	Africa	Namibia	Beyer2012	B_anthracis_20120_1	A.Br.Aust94	37	10	16	7	57	17	2	6	20	4	4	4
2012Beyer_220	Africa	Okaukuejo,_Namibia	Beyer2012	B_anthracis_20120_1	A.Br.Aust94	37	10	16	7	57	17	2	6	20	4	4	4
2012Beyer_221	Africa	Namibia	Beyer2012	B_anthracis_20120_1	A.Br.Aust94	37	10	16	7	57	17	2	6	20	4	4	4
2012Beyer_222	Africa	Namibia	Beyer2012	B_anthracis_20120_1	A.Br.Aust94	37	10	16	7	57	17	2	6	20	4	4	4
2012Beyer_223	Africa	Leeubron,_Namibia	Beyer2012	B_anthracis_20120_1	A.Br.Aust94	37	10	16	7	57	17	2	6	20	4	4	4
2012Beyer_224	Africa	Leeubron,_Namibia	Beyer2012	B_anthracis_20120_1	A.Br.Aust94	37	10	16	7	57	17	2	6	20	4	4	4
2012Beyer_225	Africa	Okaukuejo,_Namibia	Beyer2012	B_anthracis_20120_1	A.Br.Aust94	37	10	16	7	57	17	2	6	20	4	4	4
2012Beyer_226	Africa	Okaukuejo,_Namibia	Beyer2012	B_anthracis_20120_1	A.Br.Aust94	37	10	16	7	57	17	2	6	20	4	4	4
2012Beyer_227	Africa	Namibia	Beyer2012	B_anthracis_20120_1	A.Br.Aust94	37	10	16	7	57	17	2	6	20	4	4	4
2012Beyer_228	Africa	Namibia	Beyer2012	B_anthracis_20120_1	A.Br.Aust94	37	10	16	7	57	17	2	6	20	4	4	4
2012Beyer_229	Africa	Leeubron,_Namibia	Beyer2012	B_anthracis_20120_1	A.Br.Aust94	37	10	16	7	57	17	2	6	20	4	4	4
2012Beyer_230	Africa	Okaukuejo,_Namibia	Beyer2012	B_anthracis_20120_1	A.Br.Aust94	37	10	16	7	57	17	2	6	20	4	4	4
2012Beyer_231	Africa	Namibia	Beyer2012	B_anthracis_20120_1	A.Br.Aust94	37	10	16	7	57	17	2	6	20	4	4	4
2012Beyer_232	Africa	Leeubron,_Namibia	Beyer2012	B_anthracis_20120_1	A.Br.Aust94	37	10	16	7	57	17	2	6	20	4	4	4
2012Beyer_233	Africa	Leeubron,_Namibia	Beyer2012	B_anthracis_20120_1	A.Br.Aust94	37	10	16	7	57	17	2	6	20	4	4	4
2012Beyer_234	Africa	Aus,_Namibia	Beyer2012	B_anthracis_20120_1	A.Br.Aust94	37	10	16	7	57	17	2	6	20	4	4	4
2012Beyer_235	Africa	Okaukuejo,_Namibia	Beyer2012	B_anthracis_20120_1	A.Br.Aust94	37	10	16	7	57	17	2	6	20	4	4	4
2012Beyer_236	Africa	Gemsbokvlate,_Namibia	Beyer2012	B_anthracis_20120_1	A.Br.Aust94	37	10	16	7	57	17	2	6	20	4	4	4
2012Beyer_237	Africa	Leeubron,_Namibia	Beyer2012	B_anthracis_20120_1	A.Br.Aust94	37	10	16	7	57	17	2	6	20	4	4	4
2012Beyer_238	Africa	Leeubron,_Namibia	Beyer2012	B_anthracis_20120_1	A.Br.Aust94	37	10	16	7	57	17	2	6	20	4	4	4
2012Beyer_239	Africa	Namibia	Beyer2012	B_anthracis_20120_1	A.Br.Aust94	37	10	16	7	57	17	2	6	20	4	4	4
2012Beyer_240	Africa	Okaukuejo,_Namibia	Beyer2012	B_anthracis_20120_1	A.Br.Aust94	37	10	16	7	57	17	2	6	20	4	4	4
2012Beyer_241	Africa	Okaukuejo,_Namibia	Beyer2012	B_anthracis_20120_1	A.Br.Aust94	37	10	16	7	57	17	2	6	20	4	4	4
2012Beyer_243	Africa	Leeubron,_Namibia	Beyer2012	B_anthracis_20120_1	A.Br.Aust94	37	10	16	7	57	17	2	6	20	4	4	4
2012Beyer_244	Africa	Leeubron,_Namibia	Beyer2012	B_anthracis_20120_1	A.Br.Aust94	37	10	16	7	57	17	2	6	20	4	4	4
2012Beyer_245	Africa	Okaukuejo,_Namibia	Beyer2012	B_anthracis_20120_1	A.Br.Aust94	37	10	16	7	57	17	2	6	20	4	4	4
2012Beyer_246	Africa	Kapupuhedi,_Namibia	Beyer2012	B_anthracis_20120_1	A.Br.Aust94	37	10	16	7	57	17	2	6	20	4	4	4
2012Beyer_247	Africa	Okaukuejo,_Namibia	Beyer2012	B_anthracis_20120_1	A.Br.Aust94	37	10	16	7	57	17	2	6	20	4	4	4
2012Beyer_248	Africa	Okaukuejo,_Namibia	Beyer2012	GT43	A.Br.Aust94	37	10	16	7	57	17	2	6	20	4	4	4
2012Beyer_249	Africa	Grunewald,_Namibia	Beyer2012	GT43	A.Br.Aust94	37	10	16	7	57	17	2	6	20	4	4	4
2012Beyer_250	Africa	Natco,_Namibia	Beyer2012	GT43	A.Br.Aust94	37	10	16	7	57	17	2	6	20	4	4	4
2012Beyer_251	Africa	Namutoni,_Namibia	Beyer2012	GT43	A.Br.Aust94	37	10	16	7	57	17	2	6	20	4	4	4
2012Beyer_252	Africa	Grootvlakte,_Namibia	Beyer2012	GT43	A.Br.Aust94	37	10	16	7	57	17	2	6	20	4	4	4
2012Beyer_253	Africa	Grunewald,_Namibia	Beyer2012	GT43	A.Br.Aust94	37	10	16	7	57	17	2	6	20	4	4	4
2012Beyer_254	Africa	Namibia	Beyer2012	GT43	A.Br.Aust94	37	10	16	7	57	17	2	6	20	4	4	4
2012Beyer_255	Africa	Adamax,_Namibia	Beyer2012	GT43	A.Br.Aust94	37	10	16	7	57	17	2	6	20	4	4	4
2012Beyer_256	Africa	Leeubron,_Namibia	Beyer2012	GT43	A.Br.Aust94	37	10	16	7	57	17	2	6	20	4	4	4
2012Beyer_257	Africa	Okondeka,_Namibia	Beyer2012	GT43	A.Br.Aust94	37	10	16	7	57	17	2	6	20	4	4	4
2012Beyer_258	Africa	Namibia	Beyer2012	GT43	A.Br.Aust94	37	10	16	7	57	17	2	6	20	4	4	4
2012Beyer_259	Africa	Grootvlakte,_Namibia	Beyer2012	GT43	A.Br.Aust94	37	10	16	7	57	17	2	6	20	4	4	4
2012Beyer_260	Africa	Okaukuejo,_Namibia	Beyer2012	GT43	A.Br.Aust94	37	10	16	7	57	17	2	6	20	4	4	4
2012Beyer_261	Africa	Okaukuejo,_Namibia	Beyer2012	GT43	A.Br.Aust94	37	10	16	7	57	17	2	6	20	4	4	4
2012Beyer_262	Africa	Adamax,_Namibia	Beyer2012	GT43	A.Br.Aust94	37	10	16	7	57	17	2	6	20	4	4	4
2012Beyer_263	Africa	Namibia	Beyer2012	GT43	A.Br.Aust94	37	10	16	7	57	17	2	6	20	4	4	4
2012Beyer_264	Africa	Namibia	Beyer2012	GT43	A.Br.Aust94	37	10	16	7	57	17	2	6	20	4	4	4
2012Beyer_265	Africa	Okaukuejo,_Namibia	Beyer2012	GT43	A.Br.Aust94	37	10	16	7	57	17	2	6	20	4	4	4
2012Beyer_266	Africa	Nomab,_Namibia	Beyer2012	GT43	A.Br.Aust94	37	10	16	7	57	17	2	6	20	4	4	4
2012Beyer_267	Africa	Gemsbokvlakte,_Namibia	Beyer2012	GT43	A.Br.Aust94	37	10	16	7	57	17	2	6	20	4	4	4
2012Beyer_268	Africa	Leeubron,_Namibia	Beyer2012	B_anthracis_20120_2	A.Br.Aust94	37	10	16	7	57	17	2	6	20	4	4	4
2012Beyer_269	Africa	Okaukuejo,_Namibia	Beyer2012	B_anthracis_20120_2	A.Br.Aust94	37	10	16	7	57	17	2	6	20	4	4	4
2012Beyer_270	Africa	Leeubron,_Namibia	Beyer2012	B_anthracis_20120_2	A.Br.Aust94	37	10	16	7	57	17	2	6	20	4	4	4
2012Beyer_271	Africa	Gemsbokvlakte,_Namibia	Beyer2012	B_anthracis_20120_2	A.Br.Aust94	37	10	16	7	57	17	2	6	20	4	4	4
2012Beyer_272	Africa	Ombika,_Namibia	Beyer2012	B_anthracis_20120_2	A.Br.Aust94	37	10	16	7	57	17	2	6	20	4	4	4
2012Beyer_273	Africa	Okaukuejo,_Namibia	Beyer2012	B_anthracis_20120_2	A.Br.Aust94	37	10	16	7	57	17	2	6	20	4	4	4
2012Beyer_274	Africa	Okaukuejo,_Namibia	Beyer2012	B_anthracis_20120_2	A.Br.Aust94	37	10	16	7	57	17	2	6	20	4	4	4
2012Beyer_275	Africa	Okaukuejo,_Namibia	Beyer2012	B_anthracis_20120_2	A.Br.Aust94	37	10	16	7	57	17	2	6	20	4	4	4
2012Beyer_276	Africa	Okaukuejo,_Namibia	Beyer2012	B_anthracis_20120_2	A.Br.Aust94	37	10	16	7	57	17	2	6	20	4	4	4
2012Beyer_277	Africa	Windhoek,_Namibia	Beyer2012	B_anthracis_20120_2	A.Br.Aust94	37	10	16	7	57	17	2	6	20	4	4	4
2012Beyer_278	Africa	Okaukuejo,_Namibia	Beyer2012	B_anthracis_20120_2	A.Br.Aust94	37	10	16	7	57	17	2	6	20	4	4	4
2012Beyer_279	Africa	Leeubron,_Namibia	Beyer2012	B_anthracis_20120_1	A.Br.Aust94	37	10	16	7	57	17	2	6	20	4	4	4
2012Beyer_280	Africa	Halali,_Namibia	Beyer2012	B_anthracis_20120_1	A.Br.Aust94	37	10	16	7	57	17	2	6	20	4	4	4
2012Beyer_281	Africa	Okaukuejo,_Namibia	Beyer2012	B_anthracis_20120_1	A.Br.Aust94	37	10	16	7	57	17	2	6	20	4	4	4
2012Beyer_282	Africa	Okaukuejo,_Namibia	Beyer2012	B_anthracis_20120_2	A.Br.Aust94	37	10	16	7	57	17	2	6	20	4	4	4
2012Beyer_283	Africa	Okaukuejo,_Namibia	Beyer2012	B_anthracis_20120_2	A.Br.Aust94	37	10	16	7	57	17	2	6	20	4	4	4
2012Beyer_284	Africa	Gemsbokvlakte,_Namibia	Beyer2012	GT40	A.Br.Aust94	37	10	16	7	57	17	2	6	20	4	4	4
2012Beyer_285	Africa	Okaukuejo,_Namibia	Beyer2012	B_anthracis_20120_1	A.Br.Aust94	37	10	16	7	57	17	2	6	20	4	4	4
2012Beyer_286	Africa	Okondeka,_Namibia	Beyer2012	GT47	A.Br.Aust94	37	10	16	7	57	17	2	6	20	4	4	4
2012Beyer_287	Africa	Namibia	Beyer2012	GT43	A.Br.Aust94	37	10	16	7	57	17	2	6	20	4	4	4
2012Beyer_288	Africa	Gemsbokvlakte,_Namibia	Beyer2012	GT43	A.Br.Aust94	37	10	16	7	57	17	2	6	20	4	4	4
2012Beyer_289	Africa	Leeuboss,_Namibia	Beyer2012	GT43	A.Br.Aust94	37	10	16	7	57	17	2	6	20	4	4	4
2012Beyer_290	Africa	Okaukuejo,_Namibia	Beyer2012	GT43	A.Br.Aust94	37	10	16	7	57	17	2	6	20	4	4	4
2012Beyer_291	Africa	Okaukuejo,_Namibia	Beyer2012	GT43	A.Br.Aust94	37	10	16	7	57	17	2	6	20	4	4	4
2012Beyer_292	Africa	Okaukuejo,_Namibia	Beyer2012	GT43	A.Br.Aust94	37	10	16	7	57	17	2	6	20	4	4	4
2012Beyer_293	Africa	Okaukuejo,_Namibia	Beyer2012	GT43	A.Br.Aust94	37	10	16	7	57	17	2	6	20	4	4	4
2012Beyer_294	Africa	Grunewald,_Namibia	Beyer2012	GT43	A.Br.Aust94	37	10	16	7	57	17	2	6	20	4	4	4
2012Beyer_295	Africa	Okaukuejo,_Namibia	Beyer2012	GT43	A.Br.Aust94	37	10	16	7	57	17	2	6	20	4	4	4
2012Beyer_296	Africa	Namibia	Beyer2012	GT43	A.Br.Aust94	37	10	16	7	57	17	2	6	20	4	4	4
2012Beyer_297	Africa	Gemsbokvlakte,_Namibia	Beyer2012	GT43	A.Br.Aust94	37	10	16	7	57	17	2	6	20	4	4	4
2012Beyer_298	Africa	Leeubron,_Namibia	Beyer2012	GT43	A.Br.Aust94	37	10	16	7	57	17	2	6	20	4	4	4
2012Beyer_299	Africa	Namibia	Beyer2012	GT43	A.Br.Aust94	37	10	16	7	57	17	2	6	20	4	4	4
2012Beyer_300	Africa	Okaukuejo,_Namibia	Beyer2012	GT43	A.Br.Aust94	37	10	16	7	57	17	2	6	20	4	4	4
2012Beyer_301	Africa	Okondeka,_Namibia	Beyer2012	GT43	A.Br.Aust94	37	10	16	7	57	17	2	6	20	4	4	4
2012Beyer_302	Africa	Wolfsne,_Namibia	Beyer2012	GT43	A.Br.Aust94	37	10	16	7	57	17	2	6	20	4	4	4
2012Beyer_303	Africa	Okondeka,_Namibia	Beyer2012	GT43	A.Br.Aust94	37	10	16	7	57	17	2	6	20	4	4	4
2012Beyer_304	Africa	Namibia	Beyer2012	GT43	A.Br.Aust94	37	10	16	7	57	17	2	6	20	4	4	4
2012Beyer_305	Africa	Gaseb,_Namibia	Beyer2012	GT43	A.Br.Aust94	37	10	16	7	57	17	2	6	20	4	4	4
2012Beyer_306	Africa	Namibia	Beyer2012	GT43	A.Br.Aust94	37	10	16	7	57	17	2	6	20	4	4	4
2012Beyer_307	Africa	Adamax,_Namibia	Beyer2012	GT43	A.Br.Aust94	37	10	16	7	57	17	2	6	20	4	4	4
2012Beyer_308	Africa	Okaukuejo,_Namibia	Beyer2012	GT43	A.Br.Aust94	37	10	16	7	57	17	2	6	20	4	4	4
2012Beyer_309	Africa	Natco,_Namibia	Beyer2012	GT43	A.Br.Aust94	37	10	16	7	57	17	2	6	20	4	4	4
2012Beyer_310	Africa	Okaukuejo,_Namibia	Beyer2012	GT43	A.Br.Aust94	37	10	16	7	57	17	2	6	20	4	4	4
2012Beyer_311	Africa	Okaukuejo,_Namibia	Beyer2012	GT43	A.Br.Aust94	37	10	16	7	57	17	2	6	20	4	4	4
2012Beyer_312	Africa	Okaukuejo,_Namibia	Beyer2012	GT43	A.Br.Aust94	37	10	16	7	57	17	2	6	20	4	4	4
2012Beyer_313	Africa	Okaukuejo,_Namibia	Beyer2012	GT43	A.Br.Aust94	37	10	16	7	57	17	2	6	20	4	4	4
2012Beyer_314	Africa	Okaukuejo,_Namibia	Beyer2012	GT43	A.Br.Aust94	37	10	16	7	57	17	2	6	20	4	4	4
2012Beyer_315	Africa	Wolfsne,_Namibia	Beyer2012	GT43	A.Br.Aust94	37	10	16	7	57	17	2	6	20	4	4	4
2012Beyer_316	Africa	Okaukuejo,_Namibia	Beyer2012	GT43	A.Br.Aust94	37	10	16	7	57	17	2	6	20	4	4	4
2012Beyer_317	Africa	Leeubron,_Namibia	Beyer2012	GT43	A.Br.Aust94	37	10	16	7	57	17	2	6	20	4	4	4
2012Beyer_318	Africa	Okaukuejo,_Namibia	Beyer2012	GT43	A.Br.Aust94	37	10	16	7	57	17	2	6	20	4	4	4
2012Beyer_319	Africa	Okondeka,_Namibia	Beyer2012	GT43	A.Br.Aust94	37	10	16	7	57	17	2	6	20	4	4	4
2012Beyer_320	Africa	Adamax,_Namibia	Beyer2012	GT43	A.Br.Aust94	37	10	16	7	57	17	2	6	20	4	4	4
2012Beyer_321	Africa	Natco,_Namibia	Beyer2012	GT43	A.Br.Aust94	37	10	16	7	57	17	2	6	20	4	4	4
2012Beyer_322	Africa	Adamax,_Namibia	Beyer2012	GT43	A.Br.Aust94	37	10	16	7	57	17	2	6	20	4	4	4
2012Beyer_323	Africa	Leeubron,_Namibia	Beyer2012	B_anthracis_20120_1	A.Br.Aust94	37	10	16	7	57	17	2	6	20	4	4	4
2012Beyer_324	Africa	Namibia	Beyer2012	B_anthracis_20120_1	A.Br.Aust94	37	10	16	7	57	17	2	6	20	4	4	4
2012Beyer_325	Africa	Okaukuejo,_Namibia	Beyer2012	B_anthracis_20120_1	A.Br.Aust94	37	10	16	7	57	17	2	6	20	4	4	4
2012Beyer_326	Africa	Namibia	Beyer2012	B_anthracis_20120_1	A.Br.Aust94	37	10	16	7	57	17	2	6	20	4	4	4
2012Beyer_327	Africa	Namibia	Beyer2012	B_anthracis_20120_1	A.Br.Aust94	37	10	16	7	57	17	2	6	20	4	4	4
2012Beyer_328	Africa	Okaukuejo,_Namibia	Beyer2012	B_anthracis_20120_1	A.Br.Aust94	37	10	16	7	57	17	2	6	20	4	4	4
2012Beyer_329	Africa	Leeubron,_Namibia	Beyer2012	B_anthracis_20120_1	A.Br.Aust94	37	10	16	7	57	17	2	6	20	4	4	4
2012Beyer_330	Africa	Okaukuejo,_Namibia	Beyer2012	B_anthracis_20120_1	A.Br.Aust94	37	10	16	7	57	17	2	6	20	4	4	4
2012Beyer_331	Africa	Okaukuejo,_Namibia	Beyer2012	B_anthracis_20120_1	A.Br.Aust94	37	10	16	7	57	17	2	6	20	4	4	4
2012Beyer_332	Africa	Namibia	Beyer2012	B_anthracis_20120_1	A.Br.Aust94	37	10	16	7	57	17	2	6	20	4	4	4
2012Beyer_333	Africa	Leeubron,_Namibia	Beyer2012	B_anthracis_20120_1	A.Br.Aust94	37	10	16	7	57	17	2	6	20	4	4	4
2012Beyer_334	Africa	Gemsbokvlakte,_Namibia	Beyer2012	B_anthracis_20120_1	A.Br.Aust94	37	10	16	7	57	17	2	6	20	4	4	4
2012Beyer_335	Africa	Sprokieswoud,_Namibia	Beyer2012	B_anthracis_20120_1	A.Br.Aust94	37	10	16	7	57	17	2	6	20	4	4	4
2012Beyer_336	Africa	Adamax,_Namibia	Beyer2012	B_anthracis_20120_1	A.Br.Aust94	37	10	16	7	57	17	2	6	20	4	4	4
2012Beyer_337	Africa	Okaukuejo,_Namibia	Beyer2012	B_anthracis_20120_1	A.Br.Aust94	37	10	16	7	57	17	2	6	20	4	4	4
2012Beyer_338	Africa	Wolfsne,_Namibia	Beyer2012	B_anthracis_20120_1	A.Br.Aust94	37	10	16	7	57	17	2	6	20	4	4	4
2012Beyer_339	Africa	Wolfsne,_Namibia	Beyer2012	B_anthracis_20120_1	A.Br.Aust94	37	10	16	7	57	17	2	6	20	4	4	4
2012Beyer_340	Africa	Leeubron,_Namibia	Beyer2012	B_anthracis_20120_1	A.Br.Aust94	37	10	16	7	57	17	2	6	20	4	4	4
2012Beyer_341	Africa	Namutoni,_Namibia	Beyer2012	B_anthracis_20120_1	A.Br.Aust94	37	10	16	7	57	17	2	6	20	4	4	4
2012Beyer_342	Africa	Gemsbokvlakte,_Namibia	Beyer2012	B_anthracis_20120_1	A.Br.Aust94	37	10	16	7	57	17	2	6	20	4	4	4
2012Beyer_343	Africa	Okaukuejo,_Namibia	Beyer2012	B_anthracis_20120_1	A.Br.Aust94	37	10	16	7	57	17	2	6	20	4	4	4
2012Beyer_344	Africa	Okaukuejo,_Namibia	Beyer2012	B_anthracis_20120_1	A.Br.Aust94	37	10	16	7	57	17	2	6	20	4	4	4
2012Beyer_345	Africa	Leeuboss,_Namibia	Beyer2012	B_anthracis_20120_1	A.Br.Aust94	37	10	16	7	57	17	2	6	20	4	4	4
2012Beyer_346	Africa	Leeubron,_Namibia	Beyer2012	B_anthracis_20120_1	A.Br.Aust94	37	10	16	7	57	17	2	6	20	4	4	4
2012Beyer_347	Africa	Okaukuejo,_Namibia	Beyer2012	B_anthracis_20120_1	A.Br.Aust94	37	10	16	7	57	17	2	6	20	4	4	4
2012Beyer_348	Africa	Okaukuejo,_Namibia	Beyer2012	B_anthracis_20120_1	A.Br.Aust94	37	10	16	7	57	17	2	6	20	4	4	4
2012Beyer_349	Africa	Okondeka,_Namibia	Beyer2012	B_anthracis_20120_1	A.Br.Aust94	37	10	16	7	57	17	2	6	20	4	4	4
2012Beyer_350	Africa	Leeubron,_Namibia	Beyer2012	B_anthracis_20120_1	A.Br.Aust94	37	10	16	7	57	17	2	6	20	4	4	4
2012Beyer_351	Africa	Namibia	Beyer2012	B_anthracis_20120_1	A.Br.Aust94	37	10	16	7	57	17	2	6	20	4	4	4
2012Beyer_352	Africa	Adamax,_Namibia	Beyer2012	B_anthracis_20120_1	A.Br.Aust94	37	10	16	7	57	17	2	6	20	4	4	4
2012Beyer_353	Africa	Okaukuejo,_Namibia	Beyer2012	B_anthracis_20120_1	A.Br.Aust94	37	10	16	7	57	17	2	6	20	4	4	4
2012Beyer_354	Africa	Leeubron,_Namibia	Beyer2012	B_anthracis_20120_2	A.Br.Aust94	37	10	16	7	57	17	2	6	20	4	4	4
2012Beyer_355	Africa	Okaukuejo,_Namibia	Beyer2012	B_anthracis_20120_2	A.Br.Aust94	37	10	16	7	57	17	2	6	20	4	4	4
2012Beyer_356	Africa	Leeubron,_Namibia	Beyer2012	GT39	A.Br.Aust94	37	10	16	7	57	17	2	6	20	4	4	4
2007vanErt_077	Africa	Zimbabwe	Van_Ert2007	GT40	A.Br.Aust94	38	10	16	7	57	17	2	6	20	4	5	4
2007vanErt_078	Africa	South_Africa	Van_Ert2007	temp67	A.Br.Aust94	38	10	16	7	57	17	2	6	20	4	5	4
2007vanErt_079	Africa	Namibia	Van_Ert2007	temp68	A.Br.Aust94	38	10	16	7	57	17	2	6	20	4	5	4
2007vanErt_080	Africa	South_Africa	Van_Ert2007	temp69	A.Br.Aust94	38	10	16	7	57	17	2	6	20	4	5	4
2007vanErt_081	Africa	South_Africa	Van_Ert2007	GT39	A.Br.Aust94	38	10	16	7	57	17	2	6	20	4	5	4
2007vanErt_082	Africa	South_Africa	Van_Ert2007	GT36	A.Br.Aust94	38	10	16	7	57	17	2	6	20	4	5	4
2007vanErt_084	Middle_East	Turkey	Van_Ert2007	GT33	A.Br.Aust94	38	10	16	7	57	17	2	6	20	4	5	4
2012Beyer_015	Africa	Namibia	Beyer2012	GT39	A.Br.Aust94	38	10	16	7	57	17	2	6	20	4	5	4
2007vanErt_092	Middle_East	Turkey	Van_Ert2007	GT35	A.Br.Aust94	39	10	16	7	57	17	2	6	21	4	4	4
2007vanErt_135	Africa	Zambia	Van_Ert2007	GT30	A.Br.005/006	40	10	16	7	57	17	2	6	21	5	4	4
2012Beyer_078	Africa	Marasburg,_Namibia	Beyer2012	GT30	A.Br.Aust94	40	10	16	7	57	17	2	6	21	5	4	4
2007vanErt_134	Africa	Zambia	Van_Ert2007	GT30	A.Br.005/006	41	10	16	7	57	17	2	6	21	6	4	4
2007vanErt_156	Europe	Italy	Van_Ert2007	GT1	A.Br.008/009	42	10	16	7	57	21	1	6	19	5	4	4
2007vanErt_195	Europe	Italy	Van_Ert2007	temp9	A.Br.008/009	43	10	16	7	57	21	1	6	20	4	4	4
2007vanErt_197	Europe	Italy	Van_Ert2007	GT1	A.Br.008/009	43	10	16	7	57	21	1	6	20	4	4	4
2007vanErt_198	Europe	Italy	Van_Ert2007	GT1	A.Br.008/009	43	10	16	7	57	21	1	6	20	4	4	4
2007vanErt_199	Europe	Italy	Van_Ert2007	GT1	A.Br.008/009	43	10	16	7	57	21	1	6	20	4	4	4
2007vanErt_160	Asia	China	Van_Ert2007	GT13	A.Br.008/009	44	10	16	7	57	21	1	6	20	5	4	3
2007vanErt_161	Asia	China	Van_Ert2007	temp83	A.Br.008/009	44	10	16	7	57	21	1	6	20	5	4	3
2007vanErt_177	Asia	China	Van_Ert2007	temp10	A.Br.008/009	44	10	16	7	57	21	1	6	20	5	4	3
2009Simonson_143	Asia	Changping,_China	Simonson2009	GT13	A.Br.008/009	44	10	16	7	57	21	1	6	20	5	4	3
2009Simonson_148	Asia	Xinjiang,_China	Simonson2009	temp10	A.Br.008/009	44	10	16	7	57	21	1	6	20	5	4	3
2009Simonson_149	Asia	Xinjiang,_China	Simonson2009	temp10	A.Br.008/009	44	10	16	7	57	21	1	6	20	5	4	3
2009Simonson_152	Asia	Xinjiang,_China	Simonson2009	temp10	A.Br.008/009	44	10	16	7	57	21	1	6	20	5	4	3
2009Simonson_156	Asia	Xinjiang,_China	Simonson2009	temp10	A.Br.008/009	44	10	16	7	57	21	1	6	20	5	4	3
2009Simonson_157	Asia	Xinjiang,_China	Simonson2009	temp10	A.Br.008/009	44	10	16	7	57	21	1	6	20	5	4	3
2009Simonson_165	Asia	Xinjiang,_China	Simonson2009	temp83	A.Br.008/009	44	10	16	7	57	21	1	6	20	5	4	3
2009Simonson_170	Asia	Xinjiang,_China	Simonson2009	temp83	A.Br.008/009	44	10	16	7	57	21	1	6	20	5	4	3
2009Simonson_174	Asia	Xinjiang,_China	Simonson2009	GT13	A.Br.008/009	44	10	16	7	57	21	1	6	20	5	4	3
2009Simonson_175	Asia	Xinjiang,_China	Simonson2009	GT13	A.Br.008/009	44	10	16	7	57	21	1	6	20	5	4	3
2009Simonson_176	Asia	Xinjiang,_China	Simonson2009	temp83	A.Br.008/009	44	10	16	7	57	21	1	6	20	5	4	3
2009Simonson_180	Asia	Xinjiang,_China	Simonson2009	GT13	A.Br.008/009	44	10	16	7	57	21	1	6	20	5	4	3
2009Simonson_183	Asia	Xinjiang,_China	Simonson2009	temp10	A.Br.008/009	44	10	16	7	57	21	1	6	20	5	4	3
2009Simonson_185	Asia	Xinjiang,_China	Simonson2009	temp10	A.Br.008/009	44	10	16	7	57	21	1	6	20	5	4	3
2009Simonson_187	Asia	Xinjiang,_China	Simonson2009	GT13	A.Br.008/009	44	10	16	7	57	21	1	6	20	5	4	3
2009Simonson_189	Asia	Xinjiang,_China	Simonson2009	temp10	A.Br.008/009	44	10	16	7	57	21	1	6	20	5	4	3
2009Simonson_190	Asia	Xinjiang,_China	Simonson2009	temp10	A.Br.008/009	44	10	16	7	57	21	1	6	20	5	4	3
2009Simonson_191	Asia	Xinjiang,_China	Simonson2009	temp10	A.Br.008/009	44	10	16	7	57	21	1	6	20	5	4	3
2007vanErt_152	Europe	France	Van_Ert2007	GT9	A.Br.008/009	45	10	16	7	57	21	1	6	20	5	4	4
2007vanErt_153	Europe	Albania	Van_Ert2007	temp83	A.Br.008/009	45	10	16	7	57	21	1	6	20	5	4	4
2007vanErt_155	Europe	France	Van_Ert2007	GT1	A.Br.008/009	45	10	16	7	57	21	1	6	20	5	4	4
2007vanErt_158	Middle_East	Turkey	Van_Ert2007	GT13	A.Br.008/009	45	10	16	7	57	21	1	6	20	5	4	4
2007vanErt_159	Europe	Albania	Van_Ert2007	GT13	A.Br.008/009	45	10	16	7	57	21	1	6	20	5	4	4
2007vanErt_168	Europe	France	Van_Ert2007	GT3	A.Br.008/009	45	10	16	7	57	21	1	6	20	5	4	4
2007vanErt_171	Europe	Albania	Van_Ert2007	GT13	A.Br.008/009	45	10	16	7	57	21	1	6	20	5	4	4
2007vanErt_172	Europe	France	Van_Ert2007	GT1b	A.Br.008/009	45	10	16	7	57	21	1	6	20	5	4	4
2007vanErt_173	Europe	Albania	Van_Ert2007	temp85	A.Br.008/009	45	10	16	7	57	21	1	6	20	5	4	4
2007vanErt_174	Europe	Italy	Van_Ert2007	GT3	A.Br.008/009	45	10	16	7	57	21	1	6	20	5	4	4
2007vanErt_175	Europe	Italy	Van_Ert2007	temp10	A.Br.008/009	45	10	16	7	57	21	1	6	20	5	4	4
2007vanErt_176	Europe	Italy	Van_Ert2007	GT2	A.Br.008/009	45	10	16	7	57	21	1	6	20	5	4	4
2007vanErt_178	Asia	China	Van_Ert2007	temp86	A.Br.008/009	45	10	16	7	57	21	1	6	20	5	4	4
2007vanErt_180	Asia	China	Van_Ert2007	GT14	A.Br.008/009	45	10	16	7	57	21	1	6	20	5	4	4
2007vanErt_182	Asia	China	Van_Ert2007	temp88	A.Br.008/009	45	10	16	7	57	21	1	6	20	5	4	4
2007vanErt_183	Asia	China	Van_Ert2007	GT14	A.Br.008/009	45	10	16	7	57	21	1	6	20	5	4	4
2007vanErt_184	Asia	China	Van_Ert2007	temp89	A.Br.008/009	45	10	16	7	57	21	1	6	20	5	4	4
2009Simonson_144	Asia	Changping,_China	Simonson2009	GT14	A.Br.008/009	45	10	16	7	57	21	1	6	20	5	4	4
2009Simonson_145	Asia	Xinjiang,_China	Simonson2009	temp89	A.Br.008/009	45	10	16	7	57	21	1	6	20	5	4	4
2009Simonson_146	Asia	Xinjiang,_China	Simonson2009	temp89	A.Br.008/009	45	10	16	7	57	21	1	6	20	5	4	4
2009Simonson_147	Asia	Xinjiang,_China	Simonson2009	temp86	A.Br.008/009	45	10	16	7	57	21	1	6	20	5	4	4
2009Simonson_150	Asia	Xinjiang,_China	Simonson2009	GT13	A.Br.008/009	45	10	16	7	57	21	1	6	20	5	4	4
2009Simonson_151	Asia	Xinjiang,_China	Simonson2009	GT13	A.Br.008/009	45	10	16	7	57	21	1	6	20	5	4	4
2009Simonson_153	Asia	Xinjiang,_China	Simonson2009	GT13	A.Br.008/009	45	10	16	7	57	21	1	6	20	5	4	4
2009Simonson_154	Asia	Xinjiang,_China	Simonson2009	GT13	A.Br.008/009	45	10	16	7	57	21	1	6	20	5	4	4
2009Simonson_158	Asia	Xinjiang,_China	Simonson2009	GT13	A.Br.008/009	45	10	16	7	57	21	1	6	20	5	4	4
2009Simonson_159	Asia	Xinjiang,_China	Simonson2009	GT14	A.Br.008/009	45	10	16	7	57	21	1	6	20	5	4	4
2009Simonson_160	Asia	Xinjiang,_China	Simonson2009	GT13	A.Br.008/009	45	10	16	7	57	21	1	6	20	5	4	4
2009Simonson_161	Asia	Xinjiang,_China	Simonson2009	GT13	A.Br.008/009	45	10	16	7	57	21	1	6	20	5	4	4
2009Simonson_162	Asia	Xinjiang,_China	Simonson2009	GT14	A.Br.008/009	45	10	16	7	57	21	1	6	20	5	4	4
2009Simonson_163	Asia	Xinjiang,_China	Simonson2009	GT13	A.Br.008/009	45	10	16	7	57	21	1	6	20	5	4	4
2009Simonson_168	Asia	Xinjiang,_China	Simonson2009	GT14	A.Br.008/009	45	10	16	7	57	21	1	6	20	5	4	4
2009Simonson_172	Asia	Xinjiang,_China	Simonson2009	temp88	A.Br.008/009	45	10	16	7	57	21	1	6	20	5	4	4
2009Simonson_178	Asia	Xinjiang,_China	Simonson2009	temp86	A.Br.008/009	45	10	16	7	57	21	1	6	20	5	4	4
2009Simonson_179	Asia	Xinjiang,_China	Simonson2009	GT13	A.Br.008/009	45	10	16	7	57	21	1	6	20	5	4	4
2009Simonson_181	Asia	Xinjiang,_China	Simonson2009	GT13	A.Br.008/009	45	10	16	7	57	21	1	6	20	5	4	4
2009Simonson_184	Asia	Xinjiang,_China	Simonson2009	GT14	A.Br.008/009	45	10	16	7	57	21	1	6	20	5	4	4
2009Simonson_186	Asia	Xinjiang,_China	Simonson2009	GT13	A.Br.008/009	45	10	16	7	57	21	1	6	20	5	4	4
2009Simonson_188	Asia	Xinjiang,_China	Simonson2009	GT13	A.Br.008/009	45	10	16	7	57	21	1	6	20	5	4	4
2007vanErt_215	America	Canada	Van_Ert2007	GT3	A.Br.WNA	46	10	16	7	57	21	1	6	21	4	4	4
2007vanErt_201	Europe	Italy	Van_Ert2007	GT3	A.Br.008/009	47	10	16	7	57	21	1	6	21	5	4	4
2007vanErt_206	America	Canada	Van_Ert2007	GT5	A.Br.WNA	47	10	16	7	57	21	1	6	21	5	4	4
2007vanErt_208	America	Canada	Van_Ert2007	GT2	A.Br.WNA	47	10	16	7	57	21	1	6	21	5	4	4
2007vanErt_209	America	USA	Van_Ert2007	GT4	A.Br.WNA	47	10	16	7	57	21	1	6	21	5	4	4
2007vanErt_210	America	Haiti	Van_Ert2007	GT4	A.Br.WNA	47	10	16	7	57	21	1	6	21	5	4	4
2007vanErt_211	America	Canada	Van_Ert2007	GT3	A.Br.WNA	47	10	16	7	57	21	1	6	21	5	4	4
2007vanErt_213	America	Canada	Van_Ert2007	GT9	A.Br.WNA	47	10	16	7	57	21	1	6	21	5	4	4
2007vanErt_216	America	Canada	Van_Ert2007	GT3	A.Br.WNA	47	10	16	7	57	21	1	6	21	5	4	4
2007vanErt_217	America	USA	Van_Ert2007	GT3	A.Br.WNA	47	10	16	7	57	21	1	6	21	5	4	4
2007vanErt_220	America	USA	Van_Ert2007	GT1	A.Br.WNA	47	10	16	7	57	21	1	6	21	5	4	4
2011Antwerpen_002	Europe	Kjustendil,_Bulgaria	Antwerpen2011	GT3	A.Br.008/009	47	10	16	7	57	21	1	6	21	5	4	4
2011Antwerpen_003	Europe	Sofia,_Bulgaria	Antwerpen2011	GT3	A.Br.008/009	47	10	16	7	57	21	1	6	21	5	4	4
2007vanErt_200	Europe	Italy	Van_Ert2007	GT3	A.Br.008/009	48	10	16	7	57	21	1	6	21	5	4	5
2007vanErt_196	Europe	Italy	Van_Ert2007	GT1	A.Br.008/009	49	10	16	7	57	21	1	6	25	4	4	4
2010Garofolo_001	Europe	Italy	Garofolo2010	GT1	A.Br.008/009	50	10	16	7	57	21	1	6	8	4	4	3
2010Garofolo_002	Europe	Italy	Garofolo2010	GT1	A.Br.008/009	50	10	16	7	57	21	1	6	8	4	4	3
2010Garofolo_003	Europe	Italy	Garofolo2010	GT1	A.Br.008/009	50	10	16	7	57	21	1	6	8	4	4	3
2010Garofolo_004	Europe	Italy	Garofolo2010	GT1	A.Br.008/009	50	10	16	7	57	21	1	6	8	4	4	3
2010Garofolo_005	Europe	Italy	Garofolo2010	GT1	A.Br.008/009	50	10	16	7	57	21	1	6	8	4	4	3
2010Garofolo_006	Europe	Italy	Garofolo2010	GT1	A.Br.008/009	50	10	16	7	57	21	1	6	8	4	4	3
2010Garofolo_007	Europe	Italy	Garofolo2010	GT1	A.Br.008/009	50	10	16	7	57	21	1	6	8	4	4	3
2010Garofolo_008	Europe	Italy	Garofolo2010	GT1	A.Br.008/009	50	10	16	7	57	21	1	6	8	4	4	3
2010Garofolo_009	Europe	Italy	Garofolo2010	GT1	A.Br.008/009	50	10	16	7	57	21	1	6	8	4	4	3
2010Garofolo_010	Europe	Italy	Garofolo2010	GT1	A.Br.008/009	50	10	16	7	57	21	1	6	8	4	4	3
2010Garofolo_011	Europe	Italy	Garofolo2010	GT1	A.Br.008/009	50	10	16	7	57	21	1	6	8	4	4	3
2010Garofolo_012	Europe	Italy	Garofolo2010	GT1	A.Br.008/009	50	10	16	7	57	21	1	6	8	4	4	3
2010Garofolo_013	Europe	Italy	Garofolo2010	GT1	A.Br.008/009	50	10	16	7	57	21	1	6	8	4	4	3
2010Garofolo_014	Europe	Italy	Garofolo2010	GT1	A.Br.008/009	50	10	16	7	57	21	1	6	8	4	4	3
2010Garofolo_015	Europe	Italy	Garofolo2010	GT1	A.Br.008/009	50	10	16	7	57	21	1	6	8	4	4	3
2010Garofolo_016	Europe	Italy	Garofolo2010	GT1	A.Br.008/009	50	10	16	7	57	21	1	6	8	4	4	3
2010Garofolo_017	Europe	Italy	Garofolo2010	GT1	A.Br.008/009	50	10	16	7	57	21	1	6	8	4	4	3
2010Garofolo_018	Europe	Italy	Garofolo2010	GT1	A.Br.008/009	50	10	16	7	57	21	1	6	8	4	4	3
2010Garofolo_019	Europe	Italy	Garofolo2010	GT1	A.Br.008/009	50	10	16	7	57	21	1	6	8	4	4	3
2010Garofolo_020	Europe	Italy	Garofolo2010	GT1	A.Br.008/009	50	10	16	7	57	21	1	6	8	4	4	3
2010Garofolo_021	Europe	Italy	Garofolo2010	GT1	A.Br.008/009	50	10	16	7	57	21	1	6	8	4	4	3
2010Garofolo_022	Europe	Italy	Garofolo2010	GT1	A.Br.008/009	50	10	16	7	57	21	1	6	8	4	4	3
2010Garofolo_023	Europe	Italy	Garofolo2010	GT1	A.Br.008/009	50	10	16	7	57	21	1	6	8	4	4	3
2010Garofolo_024	Europe	Italy	Garofolo2010	GT1	A.Br.008/009	50	10	16	7	57	21	1	6	8	4	4	3
2010Garofolo_025	Europe	Italy	Garofolo2010	GT1	A.Br.008/009	50	10	16	7	57	21	1	6	8	4	4	3
2010Garofolo_026	Europe	Italy	Garofolo2010	GT1	A.Br.008/009	50	10	16	7	57	21	1	6	8	4	4	3
2010Garofolo_027	Europe	Italy	Garofolo2010	GT1	A.Br.008/009	50	10	16	7	57	21	1	6	8	4	4	3
2010Garofolo_028	Europe	Italy	Garofolo2010	GT1	A.Br.008/009	50	10	16	7	57	21	1	6	8	4	4	3
2010Garofolo_029	Europe	Italy	Garofolo2010	GT1	A.Br.008/009	50	10	16	7	57	21	1	6	8	4	4	3
2010Garofolo_030	Europe	Italy	Garofolo2010	GT1	A.Br.008/009	50	10	16	7	57	21	1	6	8	4	4	3
2010Garofolo_031	Europe	Italy	Garofolo2010	GT1	A.Br.008/009	50	10	16	7	57	21	1	6	8	4	4	3
2010Garofolo_032	Europe	Italy	Garofolo2010	GT1	A.Br.008/009	50	10	16	7	57	21	1	6	8	4	4	3
2010Garofolo_033	Europe	Italy	Garofolo2010	GT1	A.Br.008/009	50	10	16	7	57	21	1	6	8	4	4	3
2010Garofolo_034	Europe	Italy	Garofolo2010	GT1	A.Br.008/009	50	10	16	7	57	21	1	6	8	4	4	3
2010Garofolo_035	Europe	Italy	Garofolo2010	GT1	A.Br.008/009	50	10	16	7	57	21	1	6	8	4	4	3
2010Garofolo_036	Europe	Italy	Garofolo2010	GT1	A.Br.008/009	50	10	16	7	57	21	1	6	8	4	4	3
2010Garofolo_037	Europe	Italy	Garofolo2010	GT1	A.Br.008/009	50	10	16	7	57	21	1	6	8	4	4	3
2010Garofolo_038	Europe	Italy	Garofolo2010	GT1	A.Br.008/009	50	10	16	7	57	21	1	6	8	4	4	3
2010Garofolo_039	Europe	Italy	Garofolo2010	GT1	A.Br.008/009	50	10	16	7	57	21	1	6	8	4	4	3
2010Garofolo_040	Europe	Italy	Garofolo2010	GT1	A.Br.008/009	50	10	16	7	57	21	1	6	8	4	4	3
2010Garofolo_041	Europe	Italy	Garofolo2010	GT1	A.Br.008/009	50	10	16	7	57	21	1	6	8	4	4	3
2010Garofolo_042	Europe	Italy	Garofolo2010	GT1	A.Br.008/009	50	10	16	7	57	21	1	6	8	4	4	3
2010Garofolo_043	Europe	Italy	Garofolo2010	GT1	A.Br.008/009	50	10	16	7	57	21	1	6	8	4	4	3
2010Garofolo_044	Europe	Italy	Garofolo2010	GT1	A.Br.008/009	50	10	16	7	57	21	1	6	8	4	4	3
2010Garofolo_045	Europe	Italy	Garofolo2010	GT1	A.Br.008/009	50	10	16	7	57	21	1	6	8	4	4	3
2010Garofolo_046	Europe	Italy	Garofolo2010	GT1	A.Br.008/009	50	10	16	7	57	21	1	6	8	4	4	3
2010Garofolo_047	Europe	Italy	Garofolo2010	GT1	A.Br.008/009	50	10	16	7	57	21	1	6	8	4	4	3
2010Garofolo_048	Europe	Italy	Garofolo2010	GT1	A.Br.008/009	50	10	16	7	57	21	1	6	8	4	4	3
2010Garofolo_049	Europe	Italy	Garofolo2010	GT1	A.Br.008/009	50	10	16	7	57	21	1	6	8	4	4	3
2010Garofolo_050	Europe	Italy	Garofolo2010	GT1	A.Br.008/009	50	10	16	7	57	21	1	6	8	4	4	3
2010Garofolo_051	Europe	Italy	Garofolo2010	GT1	A.Br.008/009	50	10	16	7	57	21	1	6	8	4	4	3
2010Garofolo_052	Europe	Italy	Garofolo2010	GT1	A.Br.008/009	50	10	16	7	57	21	1	6	8	4	4	3
2010Garofolo_053	Europe	Italy	Garofolo2010	GT1	A.Br.008/009	50	10	16	7	57	21	1	6	8	4	4	3
2010Garofolo_054	Europe	Italy	Garofolo2010	GT1	A.Br.008/009	50	10	16	7	57	21	1	6	8	4	4	3
2007vanErt_179	Asia	China	Van_Ert2007	temp86	A.Br.008/009	51	10	16	7	57	21	1	7	20	5	4	4
2009Simonson_155	Asia	Xinjiang,_China	Simonson2009	temp86	A.Br.008/009	51	10	16	7	57	21	1	7	20	5	4	4
2009Simonson_164	Asia	Xinjiang,_China	Simonson2009	temp86	A.Br.008/009	51	10	16	7	57	21	1	7	20	5	4	4
2009Simonson_166	Asia	Xinjiang,_China	Simonson2009	temp86	A.Br.008/009	51	10	16	7	57	21	1	7	20	5	4	4
2009Simonson_169	Asia	Xinjiang,_China	Simonson2009	temp86	A.Br.008/009	51	10	16	7	57	21	1	7	20	5	4	4
2009Simonson_171	Asia	Xinjiang,_China	Simonson2009	temp86	A.Br.008/009	51	10	16	7	57	21	1	7	20	5	4	4
2007vanErt_167	Europe	Italy	Van_Ert2007	GT3	A.Br.008/009	52	10	16	7	57	21	1	8	20	5	4	4
2007vanErt_170	Middle_East	Turkey	Van_Ert2007	GT23	A.Br.008/009	53	10	16	7	57	21	2	6	20	5	4	4
2007vanErt_181	Asia	China	Van_Ert2007	temp87	A.Br.008/009	53	10	16	7	57	21	2	6	20	5	4	4
2009Simonson_167	Asia	Xinjiang,_China	Simonson2009	temp87	A.Br.008/009	53	10	16	7	57	21	2	6	20	5	4	4
2009Simonson_177	Asia	Xinjiang,_China	Simonson2009	temp87	A.Br.008/009	53	10	16	7	57	21	2	6	20	5	4	4
2007vanErt_148	Africa	Zambia	Van_Ert2007	GT26	A.Br.005/006	54	10	16	7	57	21	2	6	21	5	4	4
2007vanErt_149	Africa	Tanzania	Van_Ert2007	temp80	A.Br.005/006	54	10	16	7	57	21	2	6	21	5	4	4
2007vanErt_151	Africa	South_Africa	Van_Ert2007	temp82	A.Br.005/006	54	10	16	7	57	21	2	6	21	5	4	4
2007vanErt_221	America	Canada	Van_Ert2007	temp97	A.Br.WNA	54	10	16	7	57	21	2	6	21	5	4	4
2007vanErt_144	Europe	UK	Van_Ert2007	GT21	A.Br.005/006	55	10	16	7	57	21	2	6	4	5	3	4
2007vanErt_145	Europe	UK	Van_Ert2007	GT24	A.Br.005/006	55	10	16	7	57	21	2	6	4	5	3	4
2007vanErt_133	Europe	Norway	Van_Ert2007	GT27	A.Br.005/006	56	10	16	7	57	21	2	7	21	4	4	4
2011Antwerpen_001	Europe	Sofia,_Bulgaria	Antwerpen2011	temp114	A.Br.008/009	57	10	16	7	57	6	1	6	21	5	4	4
2007vanErt_130	Asia	South_Korea	Van_Ert2007	GT34	A.Br.005/006	58	10	16	7	65	17	2	5	21	6	4	4
2007vanErt_046	Asia	Indonesia	Van_Ert2007	GT64	A.Br.001/002	59	10	16	8	53	17	2	6	20	4	3	5
2007vanErt_044	Asia	Thailand	Van_Ert2007	temp61	A.Br.001/002	60	10	16	8	53	17	2	6	20	4	5	5
2007vanErt_106	America	USA	Van_Ert2007	GT51	A.Br.003/004	61	10	16	8	57	17	2	6	20	4	4	4
2007vanErt_157	Middle_East	Turkey	Van_Ert2007	GT11	A.Br.008/009	62	10	16	8	57	21	1	6	20	5	4	4
2007vanErt_205	America	USA	Van_Ert2007	GT10	A.Br.WNA	63	10	16	8	57	21	1	6	21	5	4	4
2007vanErt_111	America	USA	Van_Ert2007	GT76	A.Br.Vollum	64	11	16	7	48	21	2	7	20	5	4	4
2007vanErt_027	Asia	China	Van_Ert2007	temp56	A.Br.Ames	65	11	16	7	53	17	2	6	20	4	4	5
2007vanErt_088	Asia	India	Van_Ert2007	GT52	A.Br.Aust94	66	11	16	7	57	17	2	6	20	4	4	4
2007vanErt_104	Africa	South_Africa	Van_Ert2007	temp72	A.Br.003/004	66	11	16	7	57	17	2	6	20	4	4	4
2007vanErt_105	America	USA	Van_Ert2007	temp72	A.Br.003/004	66	11	16	7	57	17	2	6	20	4	4	4
2012Beyer_357	Africa	Okaukuejo,_Namibia	Beyer2012	B_anthracis_20120_8	A.Br.Aust94	66	11	16	7	57	17	2	6	20	4	4	4
2007vanErt_138	Africa	Botswana	Van_Ert2007	temp77	A.Br.005/006	67	11	16	7	57	17	2	6	21	5	4	4
2007vanErt_185	Europe	Slovakia	Van_Ert2007	GT18	A.Br.008/009	68	11	16	7	57	21	1	6	20	5	4	4
2007vanErt_186	Europe	Hungary	Van_Ert2007	GT16	A.Br.008/009	68	11	16	7	57	21	1	6	20	5	4	4
2007vanErt_187	Europe	Norway	Van_Ert2007	GT17	A.Br.008/009	68	11	16	7	57	21	1	6	20	5	4	4
2007vanErt_188	Europe	Poland	Van_Ert2007	GT15	A.Br.008/009	68	11	16	7	57	21	1	6	20	5	4	4
2011Antwerpen_006	Europe	Silistra,_Bulgaria	Antwerpen2011	GT17	A.Br.008/009	69	11	16	7	57	21	1	6	21	5	4	4
2011Antwerpen_007	Europe	Silistra,_Bulgaria	Antwerpen2011	GT17	A.Br.008/009	69	11	16	7	57	21	1	6	21	5	4	4
2011Antwerpen_008	Europe	Tarnovo,_Bulgaria	Antwerpen2011	GT17	A.Br.008/009	69	11	16	7	57	21	1	6	21	5	4	4
2011Antwerpen_009	Europe	Tarnovo,_Bulgaria	Antwerpen2011	GT17	A.Br.008/009	69	11	16	7	57	21	1	6	21	5	4	4
2011Antwerpen_010	Europe	Jambol,_Bulgaria	Antwerpen2011	GT17	A.Br.008/009	69	11	16	7	57	21	1	6	21	5	4	4
2011Antwerpen_011	Europe	Jambol,_Bulgaria	Antwerpen2011	GT17	A.Br.008/009	69	11	16	7	57	21	1	6	21	5	4	4
2007vanErt_142	Europe	Italy	Van_Ert2007	temp14	A.Br.005/006	70	11	16	8	57	21	2	6	21	5	3	4
2007vanErt_139	Africa	South_Africa	Van_Ert2007	temp78	A.Br.005/006	71	12	16	7	57	17	2	6	21	5	4	4
2007vanErt_140	Africa	South_Africa	Van_Ert2007	GT67	A.Br.005/006	71	12	16	7	57	17	2	6	21	5	4	4
2007vanErt_141	Africa	South_Africa	Van_Ert2007	GT67	A.Br.005/006	71	12	16	7	57	17	2	6	21	5	4	4
2007vanErt_214	America	USA	Van_Ert2007	temp95	A.Br.WNA	72	12	16	7	57	21	1	6	21	5	4	4
2007vanErt_136	Africa	Tanzania	Van_Ert2007	temp76	A.Br.005/006	73	7	16	7	57	17	2	6	21	5	4	3
2007vanErt_137	Africa	Tanzania	Van_Ert2007	temp76	A.Br.005/006	74	7	16	7	57	17	2	6	21	5	4	4
2007vanErt_191	Europe	Italy	Van_Ert2007	GT20	A.Br.008/009	75	8	12	7	57	21	1	6	20	5	4	4
2007vanErt_116	Europe	UK	Van_Ert2007	GT77	A.Br.Vollum	76	8	16	6	48	21	2	6	20	5	2	4
2007vanErt_117	Africa	Zimbabwe	Van_Ert2007	GT77	A.Br.Vollum	76	8	16	6	48	21	2	6	20	5	2	4
2007vanErt_095	Middle_East	Turkey	Van_Ert2007	GT46	A.Br.Aust94	77	8	16	7	57	17	2	6	20	4	4	4
2007vanErt_103	America	Argentina	Van_Ert2007	GT46	A.Br.003/004	77	8	16	7	57	17	2	6	20	4	4	4
2007vanErt_164	Europe	France	Van_Ert2007	temp84	A.Br.008/009	78	8	16	7	57	21	1	6	20	5	4	4
2007vanErt_189	Asia	China	Van_Ert2007	temp90	A.Br.008/009	78	8	16	7	57	21	1	6	20	5	4	4
2007vanErt_192	Europe	Hungary	Van_Ert2007	GT19	A.Br.008/009	78	8	16	7	57	21	1	6	20	5	4	4
2007vanErt_193	Europe	Italy	Van_Ert2007	GT19	A.Br.008/009	78	8	16	7	57	21	1	6	20	5	4	4
2009Simonson_173	Asia	Xinjiang,_China	Simonson2009	temp90	A.Br.008/009	78	8	16	7	57	21	1	6	20	5	4	4
2007vanErt_190	Asia	China	Van_Ert2007	temp91	A.Br.008/009	79	8	16	7	57	21	1	6	20	5	5	4
2009Simonson_182	Asia	Xinjiang,_China	Simonson2009	temp91	A.Br.008/009	79	8	16	7	57	21	1	6	20	5	5	4
2007vanErt_005	Africa	Mozambique	Van_Ert2007	GT85	B.Br.001/002	80	9	11	8	53	17	2	5	24	5	2	3
2007vanErt_022	Europe	Poland	Van_Ert2007	temp5	B.Br.CNEVA	81	9	15	5	53	17	2	5	22	5	2	5
2007vanErt_021	Europe	Germany	Van_Ert2007	temp54	B.Br.CNEVA	82	9	15	5	53	17	2	5	22	5	3	5
2007vanErt_023	Europe	Poland	Van_Ert2007	temp5	B.Br.CNEVA	83	9	15	5	53	17	2	5	23	5	2	5
2007vanErt_019	Europe	Slovakia	Van_Ert2007	GT79	B.Br.CNEVA	84	9	15	7	53	17	2	5	22	5	3	5
2007vanErt_017	Europe	France	Van_Ert2007	GT79	B.Br.CNEVA	85	9	15	7	53	17	2	5	23	5	3	5
2007vanErt_020	Europe	France	Van_Ert2007	GT80	B.Br.CNEVA	86	9	15	7	53	17	2	5	23	5	3	6
2007vanErt_018	Europe	Italy	Van_Ert2007	GT79	B.Br.CNEVA	87	9	15	7	53	17	2	5	24	5	3	5
2007vanErt_113	Europe	Norway	Van_Ert2007	GT78	A.Br.Vollum	88	9	16	6	48	21	2	6	20	5	2	4
2007vanErt_112	America	USA	Van_Ert2007	GT78	A.Br.Vollum	89	9	16	6	48	21	2	6	20	5	4	4
2007vanErt_062	America	USA	Van_Ert2007	GT68	A.Br.Aust94	90	9	16	6	57	17	2	6	20	4	4	4
2007vanErt_219	America	Mexico	Van_Ert2007	temp96	A.Br.WNA	91	9	16	7	41	21	1	6	21	4	4	4
2007vanErt_041	Asia	China	Van_Ert2007	GT60	A.Br.001/002	92	9	16	7	53	17	2	6	20	4	4	5
2009Simonson_070	Asia	Qingdao,_China	Simonson2009	GT60	A.Br.001/002	92	9	16	7	53	17	2	6	20	4	4	5
2007vanErt_054	Europe	Germany	Van_Ert2007	GT60	A.Br.001/002	93	9	16	7	53	17	2	6	4	4	4	5
2007vanErt_093	Middle_East	Turkey	Van_Ert2007	GT41	A.Br.Aust94	94	9	16	7	57	17	2	6	20	4	4	4
2007vanErt_218	America	USA	Van_Ert2007	GT6	A.Br.WNA	95	9	16	7	57	21	1	6	20	4	4	4
2007vanErt_165	Europe	France	Van_Ert2007	GT6	A.Br.008/009	96	9	16	7	57	21	1	6	20	5	4	4
2007vanErt_207	America	Canada	Van_Ert2007	GT7	A.Br.WNA	97	9	16	7	57	21	1	6	21	5	4	4
2007vanErt_150	Africa	Zambia	Van_Ert2007	temp81	A.Br.005/006	98	9	16	7	57	21	2	6	21	5	4	4
2007vanErt_146	Africa	Namibia	Van_Ert2007	temp79	A.Br.005/006	99	9	16	7	57	21	2	6	4	5	3	4
2007vanErt_147	Europe	UK	Van_Ert2007	GT22	A.Br.005/006	99	9	16	7	57	21	2	6	4	5	3	4
2007vanErt_006	America	USA	Van_Ert2007	GT89	B.Br.001/002	100	9	19	7	53	17	2	5	24	5	3	3
2007vanErt_010	Africa	South_Africa	Van_Ert2007	GT83	B.Br.001/002	101	9	19	8	53	17	2	5	23	5	3	3
2007vanErt_011	Africa	Zimbabwe	Van_Ert2007	GT81	B.Br.001/002	101	9	19	8	53	17	2	5	23	5	3	3
2007vanErt_002	America	USA	Van_Ert2007	GT88	B.Br.KrugerB	102	9	19	8	53	17	2	5	24	5	3	3
2007vanErt_003	Africa	South_Africa	Van_Ert2007	GT87	B.Br.KrugerB	102	9	19	8	53	17	2	5	24	5	3	3
2007vanErt_004	Africa	Mozambique	Van_Ert2007	GT81	B.Br.001/002	102	9	19	8	53	17	2	5	24	5	3	3
2007vanErt_008	Africa	South_Africa	Van_Ert2007	GT82	B.Br.001/002	102	9	19	8	53	17	2	5	24	5	3	3
2007vanErt_009	Europe	Norway	Van_Ert2007	GT86	B.Br.001/002	102	9	19	8	53	17	2	5	24	5	3	3
2007vanErt_012	Africa	Mozambique	Van_Ert2007	GT83	B.Br.001/002	102	9	19	8	53	17	2	5	24	5	3	3
2007vanErt_016	Africa	Zimbabwe	Van_Ert2007	temp53	B.Br.001/002	102	9	19	8	53	17	2	5	24	5	3	3
2007vanErt_014	Africa	South_Africa	Van_Ert2007	GT81	B.Br.001/002	103	9	19	8	53	17	2	5	24	5	4	3
2007vanErt_013	America	USA	Van_Ert2007	GT83	B.Br.001/002	104	9	19	8	53	17	2	5	28	5	3	3
Slide id 6	Africa	Zambia	Current study	na	A.Br.005/006	34	10	16	7	57	17	2	6	17	4	5	3
Slide id 7	Africa	Zambia	Current study	na	A.Br.005/006	34	10	16	7	57	17	2	6	17	4	5	3
Slide id 8	Africa	Zambia	Current study	na	A.Br.005/006	34	10	16	7	57	17	2	6	17	4	5	3
Slide id 11	Africa	Zambia	Current study	na	A.Br.005/006	34	10	16	7	57	17	2	6	17	4	5	3
Slide id 13	Africa	Zambia	Current study	na	A.Br.005/006	34	10	16	7	57	17	2	6	17	4	5	3
Slide id 14	Africa	Zambia	Current study	na	A.Br.005/006	34	10	16	7	57	17	2	6	17	4	5	3
Slide id 15	Africa	Zambia	Current study	na	A.Br.005/006	34	10	16	7	57	17	2	6	17	4	5	3
Slide id 17	Africa	Zambia	Current study	na	A.Br.005/006	34	10	16	7	57	17	2	6	17	4	5	3
Slide id 18	Africa	Zambia	Current study	na	A.Br.005/006	34	10	16	7	57	17	2	6	17	4	5	3
Slide id 19	Africa	Zambia	Current study	na	A.Br.005/006	34	10	16	7	57	17	2	6	17	4	5	3
