# Supplementary material for: Use of Canonical Single Nucleotide Polymorphism (CanSNPs) to characterize Bacillus anthracis outbreak strains in Zambia between 1990 and 2014
Source: PeerJ. 2018 Jul 26;6:e5270. doi: 10.7717/peerj.5270 (PMC6064633; doi:10.7717/peerj.5270)
Supplement: Table S2 [file peerj-06-5270-s002.xlsx]

## Sheet: Foglio1
id	Continent	origin	publication	MVA8_Keim	CanSNPs13	St	vrra	vrrb1	vrrb2	vrrc1	vrrc2	cg3	pXO1	pXO2	Bams01	Bavntr12	Bavntr16	Bavntr17	Bavntr19	Bavntr23	Bavntr35
2007vanErt_135	Africa	Zambia	Van_Ert2007	GT30	A.Br.005/006	3	10	16	7	57	17	2	7	7	10	6	21	4	5	4	4
2007vanErt_134	Africa	Zambia	Van_Ert2007	GT30	A.Br.005/006	4	10	16	7	57	17	2	7	7	10	6	21	4	6	4	4
2007vanErt_132	Asia	Indonesia	Van_Ert2007	GT31	A.Br.005/006	5	10	16	7	57	17	2	7	8	13	5	21	4	6	4	4
2007vanErt_131	Asia	South_Korea	Van_Ert2007	temp3	A.Br.005/006	6	10	16	7	57	17	2	7	9	12	5	21	5	6	4	4
2007vanErt_128	Asia	South_Korea	Van_Ert2007	temp3	A.Br.005/006	7	10	16	7	57	17	2	7	9	13	5	21	5	6	4	4
H9401	Asia	Korea	na	temp3	A.Br.005/006	7	10	16	7	57	17	2	7	9	13	5	21	5	6	4	4
2007vanErt_129	Asia	Indonesia	Van_Ert2007	temp3	A.Br.005/006	8	10	16	7	57	17	2	7	9	13	5	4	5	6	4	4
2007vanErt_133	Europe	Norway	Van_Ert2007	GT27	A.Br.005/006	9	10	16	7	57	21	2	10	9	13	7	21	5	4	4	4
2007vanErt_149	Africa	Tanzania	Van_Ert2007	temp80	A.Br.005/006	10	10	16	7	57	21	2	6	8	13	6	21	4	5	4	4
2007vanErt_148	Africa	Zambia	Van_Ert2007	GT26	A.Br.005/006	11	10	16	7	57	21	2	6	9	13	6	21	4	5	4	4
2007vanErt_151	Africa	South_Africa	Van_Ert2007	temp82	A.Br.005/006	12	10	16	7	57	21	2	7	12	12	6	21	4	5	4	4
2007vanErt_144	Europe	UK	Van_Ert2007	GT21	A.Br.005/006	13	10	16	7	57	21	2	7	8	13	6	4	4	5	3	4
2007vanErt_145	Europe	UK	Van_Ert2007	GT24	A.Br.005/006	14	10	16	7	57	21	2	9	8	13	6	4	4	5	3	4
2007vanErt_130	Asia	South_Korea	Van_Ert2007	GT34	A.Br.005/006	15	10	16	7	65	17	2	7	9	13	5	21	5	6	4	4
2007vanErt_138	Africa	Botswana	Van_Ert2007	temp77	A.Br.005/006	16	11	16	7	57	17	2	6	7	10	6	21	4	5	4	4
2007vanErt_142	Europe	Italy	Van_Ert2007	temp14	A.Br.005/006	17	11	16	8	57	21	2	7	8	11	6	21	4	5	3	4
2007vanErt_139	Africa	South_Africa	Van_Ert2007	temp78	A.Br.005/006	18	12	16	7	57	17	2	6	14	10	6	21	4	5	4	4
2007vanErt_140	Africa	South_Africa	Van_Ert2007	GT67	A.Br.005/006	19	12	16	7	57	17	2	6	7	10	6	21	4	5	4	4
2007vanErt_141	Africa	South_Africa	Van_Ert2007	GT67	A.Br.005/006	20	12	16	7	57	17	2	6	7	10	6	21	5	5	4	4
2007vanErt_136	Africa	Tanzania	Van_Ert2007	temp76	A.Br.005/006	21	7	16	7	57	17	2	7	8	10	6	21	4	5	4	3
2007vanErt_137	Africa	Tanzania	Van_Ert2007	temp76	A.Br.005/006	22	7	16	7	57	17	2	7	8	10	6	21	4	5	4	4
2007vanErt_150	Africa	Zambia	Van_Ert2007	temp81	A.Br.005/006	23	9	16	7	57	21	2	6	9	13	6	21	4	5	4	4
2007vanErt_147	Europe	UK	Van_Ert2007	GT22	A.Br.005/006	24	9	16	7	57	21	2	7	8	13	6	4	4	5	3	4
2007vanErt_146	Africa	Namibia	Van_Ert2007	temp79	A.Br.005/006	25	9	16	7	57	21	2	7	9	13	6	4	4	5	3	4
Slide id 6	Africa	Zambia	Current study	na	A.Br.005/006	1	10	16	7	57	17	2	7	7	10	6	17	4	4	5	3
Slide id 7	Africa	Zambia	Current study	na	A.Br.005/006	1	10	16	7	57	17	2	7	7	10	6	17	4	4	5	3
Slide id 8	Africa	Zambia	Current study	na	A.Br.005/006	1	10	16	7	57	17	2	7	7	10	6	17	4	4	5	3
Slide id 11	Africa	Zambia	Current study	na	A.Br.005/006	1	10	16	7	57	17	2	7	7	10	6	17	4	4	5	3
Slide id 13	Africa	Zambia	Current study	na	A.Br.005/006	2	10	16	7	57	17	2	7	7	10	6	17	5	4	5	3
Slide id 14	Africa	Zambia	Current study	na	A.Br.005/006	1	10	16	7	57	17	2	7	7	10	6	17	4	4	5	3
Slide id 15	Africa	Zambia	Current study	na	A.Br.005/006	2	10	16	7	57	17	2	7	7	10	6	17	5	4	5	3
Slide id 17	Africa	Zambia	Current study	na	A.Br.005/006	1	10	16	7	57	17	2	7	7	10	6	17	4	4	5	3
Slide id 18	Africa	Zambia	Current study	na	A.Br.005/006	2	10	16	7	57	17	2	7	7	10	6	17	5	4	5	3
Slide id 19	Africa	Zambia	Current study	na	A.Br.005/006	2	10	16	7	57	17	2	7	7	10	6	17	5	4	5	3
